# Supplementary material
Source: HighWire-hosted journal article supplement (https://www.rsfjournal.org/highwire/filestream/3550/field_highwire_adjunct_files/0/LevyYingBagley-appendix.xlsx)
Supplement: LevyYingBagley-appendix.xlsx [file LevyYingBagley-appendix.xlsx]

## Sheet: Provisions Database
Title	McDonough Text [3]	McDonough Text Broken into Individual Provisions (If Applicable)	CRS Summary ([4, 5]]	§ (of PPACA or HCERA)	Modified by Legislative Action [6]	Implementation Mentioned In Federal Register? [152]	Implementation Progress	Include Row in Key Provisions Count?	Potentially Doesn't Require Implementation	Rating (Method A) 0 = None 1 = Minority 2 = ~Half 3 = Majority 4 = Fully/Virtually Fully	Rating (Method B) 0 = None 1 = Some 2 = Fully/Virtually Fully	Notes	Average Rating (Method A)	Average Rating (Method B)	Average Rating as Percent (Method B)	Count of Key Provisions
1	"A prohibition on lifetime and annual benefit caps by insurers--though the restrictions on annual caps don't take full effect until 2014 (sections 1001/2711)."		"Amends the Public Health Service Act to prohibit a health plan ("health plan” under this subtitle excludes any “grandfathered health plan” as defined in section 1251) from establishing lifetime limits or annual limits on the dollar value of benefits for any participant or beneficiary after January 1, 2014."	1001(5)(2711)(a)	N	Y	On June 28, 2010, the IRS, Employee Benefits Security Administration, and HHS implemented this provision. [195, p. 37189]	1		4	2		3.46939	1.7551	0.877551	49
1	"A prohibition on an insurance industry practice known as “rescissions,” which a company uses to cancel someone’s coverage after the individual files a claim because of an alleged error or misstatement on a coverage application. Rescissions connected with fraud or deliberate misrepresentations by a policyholder are permitted (sections 1001/2712)."		"Prohibits a health plan from rescinding coverage of an enrollee except in the case of fraud or intentional misrepresentation of material fact."	1001(2712)	N	Y	On June 28, 2010, the IRS, Employee Benefits Security Administration, and HHS implemented this provision. [195, p. 37189]	1		4	2
1	"A requirement that all insurance policies must cover clinical preventive health services with an A or B rating from the U.S. Preventive Services Task Force (more on this in Title V, discussed in chapter 9) and must provide these services without cost sharing (sections 1001/2713)."		"Requires health plans to provide coverage for, and to not impose any cost sharing requirements for: (1) specified preventive items or services; (2) recommended immunizations; and (3) recommended preventive care and screenings for women and children."	1001(2713)(a)	N	Y	On July 19, 2010, the IRS, Employee Benefits Security Administration, and HHS implemented this provision. [196, p. 41728]	1		4	2
1	"A rule that insurers and plans must allow parents to keep their adult children on their health insurance plans until the son or daughter reaches age twenty-six (sections 1001/2714)."		"Requires a health plan that provides dependent coverage of children to make such coverage available for an unmarried, adult child until the child turns 26 years of age."	1001(2714)(a)	N	Y	On May 13, 2010, the IRS, Employee Benefits Security Administration, and HHS implemented this provision. [194, p. 27123]	1		4	2
1	"New standards that insurers must follow to provide enrollees with a clear and understandable summary of benefits and coverage not exceeding “4 pages in length” and not including print “smaller than 12-point font” (sections 1001/2715)."		"Requires the Secretary of Health and Human Services (HHS) to develop standards for health plans (including grandfathered health plans) to provide an accurate summary of benefits and coverage explanation."	1001(2715)(a-b)	N	Y	On February 14, 2012, the IRS, Employee Benefits Security Administration, and HHS implemented this provision. [198, p. 8668]	1		4	2
1	"A rebate to consumers if an insurer spends less than 85 or 80 percent of premium dollars on medical-related expenditures, plus mandatory reporting to the HHS secretary and the public on each insurer’s “medical loss ratio” (sections 1001/2718)."	"mandatory reporting to the HHS secretary and the public on each insurer’s “medical loss ratio”"	"Requires a health plan (including a grandfathered health plan) to... submit to the Secretary a report concerning the ratio of the incurred loss (or incurred claims) plus the loss adjustment expense (or change in contract reserves) to earned premiums."	1001(2718)(a)	N	Y	On December 1, 2010, HHS implemented this provision. [199, p. 74865]	1		4	2
		"A rebate to consumers if an insurer spends less than 85 or 80 percent of premium dollars on medical-related expenditures"	"Requires a health plan (including a grandfathered health plan) to... provide an annual rebate to each enrollee if the ratio of the amount of premium revenue expended by the issuer on reimbursement for clinical services provided to enrollees and activities that improve health care quality to the total amount of premium revenue for the plan year is less than a 85% for large group markets or 80% fo…	1001(2718)(b)	N	Y	On December 1, 2010, HHS implemented this provision. [199, p. 74865]	1		4	2
1	"New national standards for internal and external appeals for consumers to challenge an insurer’s coverage determinations and claims decisions (sections 1001/2719)."		"Requires a health plan to implement an effective process for appeals of coverage determinations and claims."	1001(2719)"(a-b)	N	Y	On July 23, 2010, the IRS, Employee Benefits Security Administration, and HHS implemented this provision. [197, p. 43331]	1		4	2
1	"Patient protections including choice of primary care providers, coverage of emergency services, and access to pediatric and obstetrical and gynecological care (sections 1001/2719a)."		"Sets forth requirements for health plans related to: (1) designation of a primary care provider; (2) coverage of emergency services; and (3) elimination of referral requirements for obstetrical or gynecological care."	1001(2719A)	N	Y	On May 13, 2010, the IRS, Employee Benefits Security Administration, and HHS implemented this provision. [194, p. 27123]	1		4	2	Sections 2719 and 2719A are distinct (2719A is not a sub-section of 2719).
1	"New grants to states to establish or expand offices of health insurance consumer assistance to help consumers file appeals and respond to complaints [+$3oM] (section 1002)."		"Requires the Secretary to award grants to states for offices of health insurance consumer assistance or health insurance ombudsman programs."	1002	N		On October 19, 2010, grants were awarded to 35 states and five territories under this provision. [200]	1		3	1
1	"An annual public review by states of “unreasonable increases in premiums for health insurance coverage” plus grants to states to help them establish or strengthen these review processes [+$25oM] (section 1003)."		"Requires the Secretary to establish a process for the annual review of unreasonable increases in premiums for health insurance coverage."	1003	N	Y	On May 23, 2011, HHS implemented this provision. [201, p. 29976]	1		4	2
1	"Creation of a $5 billion program (until 2014) to provide health insurance for high-risk uninsured individuals who have preexisting conditions that block them from obtaining coverage. The U.S. Department of Health and Human Services calls this the Pre-Existing Condition Insurance Plan. The program may be run through existing state high-risk pools where states are willing [+$5B] (section 1101)."		"Requires the Secretary to establish a temporary high risk health insurance pool program to provide health insurance coverage to eligible individuals with a preexisting condition. Terminates such coverage on January 1, 2014, and provides for a transition to an American Health Benefit Exchange (Exchange)."	1101	N	Y	On July 30, 2010, HHS implemented this provision. [202, p. 45014]	1		4	2
1	"Establishment of a program to subsidize employer and union plans that cover early retirees between ages fifty-five and sixty-four. DHHS calls this the Early Retiree Reinsurance Program, and $5 billion is provided through 2014 [+$5B] (section 1102)."		"Requires the Secretary to establish a temporary reinsurance program to provide reimbursement to participating employment-based plans for a portion of the cost of providing health insurance coverage to early retirees before January 1, 2014."	1102	N	Y	On May 5, 2010, HHS implemented this provision. [203, p. 24450]	1		4	2
1	"Development by DHHS of a new Internet portal for individuals and businesses to find coverage options for themselves and their workers. The site launched in 2010 at http://www.healthcare.gov/ (section 1103)."		"Requires the Secretary to establish a mechanism, including an Internet website, through which a resident of, or small business in, any state may identify affordable health insurance coverage options in that state."	1103	N		In July 2010, HHS implemented this provision as www.healthcare.gov. [204]	1		4	2
1	"New “administrative simplification” standards for the electronic exchange of information to simplify and reduce the paperwork and clerical burden on patients, providers, and insurers, effective January 2, 2013 [−$11.6B] (section 1104)."		"Sets forth provisions governing electronic health care transactions."	1104	N		On July 8, 2011, HHS implemented this provision. [205; p. 40458]	1		4	2
1	"New rules affecting the individual and group insurance markets in all fifty states. These include no discrimination or preexisting-condition exclusions based on health status (permitted within specified limits for tobacco use, age, and wellness program participation), guaranteed availability and renewal of coverage, no discrimination in issuing insurance based on health status, required inclusio…	"permitted within specified limits for tobacco use, age"	"Allows premium rates to vary only by individual or family coverage, rating area, age, or tobacco use."	1201(2701)	N	Y	On February 27, 2013, HHS implemented this provision. [206, p. 13431]	1		4	2
		"guaranteed availability... of coverage	"Requires health plans in a state to... accept every employer and individual in the state that applies for coverage;"	1201(2702)	N	Y	On February 27, 2013, HHS implemented this provision. [206, p. 13415]	1		4	2
		"guaranteed... renewal of coverage"	"Requires health plans in a state to... renew or continue coverage at the option of the plan sponsor or the individual, as applicable."	1201(2703)	N	Y	On February 27, 2013, HHS implemented this provision. [206, p. 13418]	1		4	2
		"no discrimination or preexisting-condition exclusions based on health status (permitted within specified limits for tobacco use, age, and wellness program participation)"	"Prohibits a health plan ("health plan” under this subtitle excludes any “grandfathered health plan” as defined in section 1251) from: (1) imposing any preexisting condition exclusion; or (2) discriminating on the basis of any health status-related factor."	1201(2704)	N	Y	On June 28, 2010, the IRS, Employee Benefits Security Administration, and HHS implemented this provision. [195, p. 37188]	1		4	2
		"no discrimination in issuing insurance based on health status" "permitted within specified limits for... wellness program participation"	"Prohibits a health plan from establishing individual eligibility rules based on health status-related factors, including medical condition, claims experience, receipt of health care, medical history, genetic information, and evidence of insurability." "Sets forth provisions governing wellness programs under the health plan, including allowing cost variances for coverage for participation in such…	1201(2705)	N	Y	On June 3, 2013, the IRS, Employee Benefits Security Administration, and HHS implemented these provisions. [207, p. 33158, 33160]	1		4	2
			"Prohibits a health plan from discriminating with respect to participation under the plan or coverage against any health care provider who is acting within the scope of that provider's license or certification under applicable state law."	1201(2706)	N		On March 23, 2010, this provision was implemented with the enactment of PPACA (the statutory language of this provision is self-implementing and the government does not plan to issue regulations in the "near future"). [208]	1		4	2
			"Requires health plans that offer health insurance coverage in the individual or small group market to ensure that such coverage includes the essential health benefits package. Requires a group health plan to ensure that any annual cost-sharing imposed under the plan does not exceed specified limitations."	1201(2707)	N	Y	On February 25, 2013, HHS implemented this provision. [209, p. 12836]	1		4	2
			"Prohibits a health plan from... applying any waiting period for coverage that exceeds 90 days;"	1201(2708)	N	Y	On March 21, 2013, the IRS, Employee Benefits Security Administration, and HHS implemented this provision. [210, p. 17313]	1		4	2
		"required coverage for individuals participating in clinical trials"	"Prohibits a health plan from... discriminating against individual participation in clinical trials with respect to treatment of cancer or any other life-threatening disease or condition."	1201(2709)	N		On March 23, 2010, this provision was implemented with the enactment of PPACA (the statutory language of this provision is self-implementing and the government does not plan to issue regulations in the "near future"). [208]	1		4	2
10	"Group health plans and health insurance issuers must provide coverage of costs for individuals participating in approved clinical trials (Sherrod Brown, D-OH) (section 10103)."		"Prohibits a health plan from... discriminating against individual participation in clinical trials with respect to treatment of cancer or any other life-threatening disease or condition."	10103(c)/1201	N		CMS states that this provision is self-implementing. [208]	0				Note that 10103(c) is identical to 1201(2709) so to avoid redundancy we are not scoring 10103c
1	"A definition of grandfathering—the right to maintain most coverage that was in effect before the ACA’s enactment—detailing which provisions apply and which do not (section 1251)."		"Provides that nothing in this Act shall be construed to require that an individual terminate coverage under a group health plan or health insurance coverage in which such individual was enrolled on the date of enactment of this Act. Allows family members of individuals currently enrolled in a plan to enroll in such plan or coverage if such enrollment was permitted under the terms of the plan. Al…	1251	N	Y	On June 17, 2010, the IRS, Employee Benefits Security Administration, and HHS implemented this provision. [193, p. 34540]	1		4	2
1	"A definition of a “qualified health plan,” meaning a health insurance plan eligible to be offered through an exchange (section 1301), and a list of “essential health benefits,” to be defined by the HHS secretary, that must be provided in all insurance policies except for grandfathered plans. Among these benefits are: ambulatory patient services emergency services hospitalization maternity and ne…	"A definition of a “qualified health plan,” meaning a health insurance plan eligible to be offered through an exchange (section 1301)"	"Defines "qualified health plan" to require that such a plan provides essential health benefits and offers at least one plan in the silver level at one plan in the gold level in each Exchange through which such plan is offered."	1301	N			0	Y
		"a list of “essential health benefits,” to be defined by the HHS secretary, that must be provided in all insurance policies except for grandfathered plans. Among these benefits are: ambulatory patient services emergency services hospitalization maternity and newborn care mental health and substance abuse services including behavioral health treatment prescription drugs rehabilitative and habilita…	"Requires the essential health benefits package to provide essential health benefits and limit cost-sharing. Directs the Secretary to... define essential health benefits and include emergency services, hospitalization, maternity and newborn care, mental health and substance use disorder services, prescription drugs, preventive and wellness services and chronic disease management, and pediatric se…	1302	N	Y	On February 25, 2013, HHS implemented this provision via a regulatory framework that gave states autonomy in defining essential health benefits. [209, p. 12834; 212]	1		4	2
1	""Special rules" relating to the coverage and noncoverage of abortion services in qualified health plans (section 1303)."		"Sets forth special rules for abortion coverage, including: (1) permitting states to elect to prohibit abortion coverage in qualified health plans offered through an Exchange in the state; (2) prohibiting federal funds from being used for abortion services; and (3) requiring separate accounts for payments for such services. Prohibits any qualified health plan offered through an Exchange from disc…	1303	N		On March 27, 2012, HHS implemented this provision. [211, p. 18429]	1		4	2
1	"Establishment of exchanges by January 1, 2014, by each state or by the HHS secretary when a state fails to act (sections 1311 and 1321)."		"Requires states to establish an American Health Benefit Exchange..." "Requires the Secretary to... establish and operate an Exchange within a state if the state does not have one operational by January 1, 2014;"	1311, 1321	N	Y	On March 27, 2012, HHS implemented this provision. [211, p. 18311]	1		4	2
1	"Definitions of “qualified individuals” and “qualified employers” eligible to obtain coverage through an exchange (section 1312). (The section specifies that, beginning in 2014, this will be the only health insurance coverage option available to members of Congress and their personal staff.)"	"Definitions of “qualified individuals” and “qualified employers” eligible to obtain coverage through an exchange"	Not mentioned	1312(f)(1-2)	N			0	Y
		"beginning in 2014, this will be the only health insurance coverage option available to members of Congress and their personal staff."	"Restricts the health plans that the federal government may make available to Members of Congress and congressional staff after the effective date of this subtitle to only those health plans that are created under this Act or offered through an Exchange."	1312(d)(3)(D)	N	Y	On October 2, 2013, the Office of Personnel Management implemented this provision. [213, p. 60653]	1		4	2
1	"Creation of new Consumer Operated and Oriented Plans (CO-OPs) to provide nonprofit, member-run health insurance options in states or groups of states (section 1322)."		"Requires the Secretary to establish the Consumer Operated and Oriented Plan (CO-OP) program to foster the creation of qualified nonprofit health insurance issuers to offer qualified health plans in the individual and small group markets. Requires the Secretary to provide for loans and grants to persons applying to become qualified nonprofit health insurance issuers. Sets forth provisions governi…	1322	Y	Y	On November 21, 2011, PL 112-10 (Department of Defense and Full-Year Continuing Appropriations Act, 2011) rescinded $2.2 billion in funding. On December 13, 2011, HHS implemented this provision as the Consumer Operated and Oriented Plan program. [214, p. 77392] On December 23, 2011, PL 112-74 (Consolidated Appropriations Act, 2012) rescinded $400 million in funding. On January 2, 2013, PL 112-240…	1		1	1
1	"Allowances for states to create alternative programs to cover eligible individuals and businesses as long as a program covers at least the same number of persons, provides all “essential benefits,” and costs the federal government no more (sections 1311 and 1332)."		"Authorizes a state to apply to the Secretary for the waiver of specified requirements under this Act with respect to health insurance coverage within that state for plan years beginning on or after January 1, 2017. Directs the Secretary to provide for an alternative means by which the aggregate amounts of credits or reductions that would have been paid on behalf of participants in the Exchange w…	1332	N	Y	On February 27, 2012, the Department of the Treasury and HHS implemented this provision. [215, p. 11700]	1		4	2
1	"Provisions permitting states to jointly offer coverage and mandating the creation of at least two new multistate plans to be offered through all fifty state exchanges (sections 1333 and 1334)."	"Provisions permitting states to jointly offer coverage"	"Requires the Secretary to issue regulations for the creation of health care choice compacts under which two or more states may enter into an agreement that: (1) qualified health plans could be offered in the individual markets in all such states only subject to the laws and regulations of the state in which the plan was written or issued; and (2) the issuer of any qualified health plan to which …	1333	N	N	On August 30, 2011, HHS reported it would coordinate with the National Association of Insurance Commissioners to implement this provision. [216, p. 53904] In February 2017, America's Health Insurance Plans, a national political advocacy association, reported that this provision had not been implemented. [217]	1		0	0
		"mandating the creation of at least two new multistate plans to be offered through all fifty state exchanges"	"Requires the Director of the Office of Personnel Management (OPM) to: (1) enter into contracts with health insurance issuers to offer at least two multistate qualified health plans through each Exchange in each state to provide individual or group coverage; and (2) implement this subsection in a manner similar to the manner in which the Director implements the Federal Employees Health Benefits P…	1334	N	Y	On March 11, 2013, the Office of Personnel Management implemented this provision. [218, p. 15560] See OPM website for more info [276] It looks like only ONE plan is offered, Arkansas BCBS	1		1	1
10	"The federal Office of Personnel Management will facilitate the offering of at least two nonprofit multi-state insurance plans to be made available through the insurance exchanges in each state (section 10104)."		Duplicate of 1334					0
1	"Establishment of reinsurance and risk adjustment so that insurers, in the early years of each exchange, do not suffer financial harm if their plans attract a high number of expensive, high-risk individuals [+$106B] (sections 1341, 1342, and 1343)."	"Establishment of reinsurance... adjustment"	"Directs each state, not later than January 1, 2014, to establish one or more reinsurance entities to carry out the reinsurance program under this section. Requires the Secretary to establish standards to enable states to establish and maintain a reinsurance program under which: (1) health insurance issuers and third party administrators on behalf of group health plans are required to make paymen…	1341	N	Y	On March 23, 2012, HHS implemented this provision. [219, p. 17220]	1		4	2
		"Establishment of risk... adjustment"	"Requires the Secretary to establish and administer a program of risk corridors for calendar years 2014 through 2016 under which a qualified health plan offered in the individual or small group market shall participate in a payment adjusted system based on the ratio of the allowable costs of the plan to the plan's aggregate premiums. Directs the Secretary to make payments when a plan's allowable …	1342	N	Y	On March 23, 2012, HHS implemented this provision. [219, p. 17220]	1		4	2
		"Establishment of risk... adjustment"	"Requires each state to assess a charge on health plans and health insurance issuers if the actuarial risk of the enrollees of such plans or coverage for a year is less than the average actuarial risk of all enrollees in all plans or coverage in the state for the year. Requires each state to provide a payment to health plans and health insurance issuers if the actuarial risk of the enrollees of s…	1343	N	Y	On March 23, 2012, HHS implemented this provision. [219, p. 17220]	1		4	2
1	"Premium tax credits and maximum premium contributions for eligible individuals and families with incomes up to 400 percent of the federal poverty level (up to about $88,000 for a family of four in 2010), and a requirement that participants contribute between 2 and 9.5 percent of income [+$350B including the cost of section 1402] (section 1401)."	"Premium tax credits and maximum premium contributions for eligible individuals and families with incomes up to 400 percent of the federal poverty level (up to about $88,000 for a family of four in 2010)"	"Amends the Internal Revenue Code to allow individual taxpayers whose household income equals or exceeds 100%, but does not exceed 400%, of the federal poverty line (as determined in the Social Security Act [SSA]) a refundable tax credit for a percentage of the cost of premiums for coverage under a qualified health plan. Sets forth formulae and rules for the calculation of credit amounts based up…	1401	Y	Y	On December 15, 2010, PL 111-309 (Medicare and Medicaid Extenders Act of 2010) "Modified the sliding scale that determines the amount of excess advance premium tax credits that individuals have to repay based on household income to increase repayment amounts." On April 14, 2011, PL 112-9 (Comprehensive 1099 Taxpayer Protection and Repayment of Exchange Subsidy Overpayments Act of 2011) modified t…	1		4	2
HCERA	"Financing for premiums and cost sharing for individuals with incomes up to 400 percent of the federal poverty level is enhanced to make subsidized premiums and cost sharing more affordable, especially for those with incomes below 250 percent of the FPL. Starting in 2019, the growth in premium tax credits is constrained if premiums grow faster than the consumer price index, unless spending is mor…	"Financing for premiums and cost sharing for individuals with incomes up to 400 percent of the federal poverty level is enhanced to make subsidized premiums and cost sharing more affordable, especially for those with incomes below 250 percent of the FPL."	Amends PPACA §1401. Already included in PPACA §1401 evaluation.					0
		"Starting in 2019, the growth in premium tax credits is constrained if premiums grow faster than the consumer price index, unless spending is more than 10 percent below current CBO projections"	"Requires adjustments, after 2014 and after 2018, of the initial and final premium percentages to reflect the excess (if any) of the rate of premium growth over the rate of growth of income and the consumer price index."	1001	N	Y	On May 23, 2012, the IRS implemented this provision. [221, p. 30389]	1		4	2
1	"Reduced cost-sharing for individuals enrolled in qualified health plans, based on income. The maximum out-of-pocket limits ($5,950 for individuals and $11,900 for families) are reduced to one-third for those between 100 and 200 percent of the federal poverty level, to one-half for those between 200 and 300 percent of the FPL, and to two-thirds for those between 300 and 400 percent of the FPL (se…		"Requires reductions in the maximum limits for out-of-pocket expenses for individuals enrolled in qualified health plans whose incomes are between 100% and 400% of the poverty line."	1402	N	Y	On March 11, 2013, HHS implemented this provision. [220, p. 15410] BUT THEN, the Trump Administration stopped paying the insurers for CSR's, but insurers found a way around that, as described at The Incidental Economist [277]	1		2	1
1	"Establishment of a new tax credit for eligible small businesses that provide health insurance to their workers, limited to 35 percent of the employer’s contribution, rising to 50 percent beginning in 2014 [+$37B] (section 1421)."		"Allows qualified small employers to elect, beginning in 2010, a tax credit for 50% of their employee health care coverage expenses. Defines "qualified small employer" as an employer who has no more than 25 employees with average annual compensation levels not exceeding $50,000. Requires a phase-out of such credit based on employer size and employee compensation."	1421	N	Y	On June 30, 2014, the IRS implemented this provision. [222, p. 36640] However, the provisions has never been particularly popular with employers [278]	1		2	1
1	"“Individual responsibility,” requiring most individuals to maintain minimum essential health insurance coverage or face a tax penalty of $95 or 1 percent of income in 2014, $325 or 2 percent of income in 2015, and $695 or 2.5 percent of income in 2016 (whichever is higher). Families will pay half the penalty amount for uninsured children, up to a $2,250 family cap. Exceptions include religious o…		"Requires individuals to maintain minimal essential health care coverage beginning in 2014. Imposes a penalty for failure to maintain such coverage beginning in 2014, except for certain low-income individuals who cannot afford coverage, members of Indian tribes, and individuals who suffer hardship. Exempts from the coverage requirement individuals who object to health care coverage on religious g…	1501	Y	Y	On April 26, 2010, PL 111-159 (TRICARE Affirmation Act) "Amended the definition of MEC to include health care provided under TRICARE, TRICARE for Life, and the Department of Defense’s Nonappropriated Fund Health Benefits." On May 27, 2010, PL 111-173 (no title) "Amended the definition of MEC to include health care provided by the Department of Veterans Affairs." On August 30, 2013, the IRS implem…	1		1	1
HCERA	"The assessment on individuals who choose to remain uninsured is changed in three ways: (1) income below the filing threshold is exempted, (2) the flat payment is lowered from $495 to $325 in 2015 and from $750 to $695 in 2016, and (3) the percent of income that is an alternative payment amount is raised from 0.5 to 1.0 percent in 2014, 1.0 to 2.0 percent in 2015, and 2.0 to 2.5 percent in 2016 a…	"income below the filing threshold is exempted"	*	1002(b)(2)	N	Y	On August 30, 2013, the IRS implemented this provision. [224, p. 53654]	1		1	1
		"the flat payment is lowered from $495 to $325 in 2015 and from $750 to $695 in 2016"	Amends PPACA §1501. Already included in PPACA §1501 evaluation and included by McDonough in his text summary					0
		"the percent of income that is an alternative payment amount is raised from 0.5 to 1.0 percent in 2014, 1.0 to 2.0 percent in 2015, and 2.0 to 2.5 percent in 2016 and subsequent years to make the assessment more progressive"						0
1	"A “free rider” provision requiring employers with two hundred or more employees to automatically enroll new full-time employees in coverage and requiring employers to notify workers about exchanges, especially when the employer does not offer coverage or pays less than 60 percent of the total cost of benefits. Larger employers (fifty or more employees) with workers who obtain exchange premium su…	"requiring employers with two hundred or more employees to automatically enroll new full-time employees in coverage"	"Amends the Fair Labor Standards Act of 1938 to... require employers with more than 200 full-time employees to automatically enroll new employees in a health care plan and provide notice of the opportunity to opt-out of such coverage;"	1511	Y		On November 2, 2015, PL 114-74 (Bipartisan Budget Act of 2015) repealed this provision. [6]	1		0	0
		"requiring employers to notify workers about exchanges, especially when the employer does not offer coverage or pays less than 60 percent of the total cost of benefits."	From summary of 1511: "provide notice to employees about an Exchange, the availability of a tax credit for premium assistance, and the loss of an employer's contribution to an employer-provided health benefit plan if the employee purchases a plan through an Exchange."	1512	N		On May 8, 2013, the Department of Labor implemented this provision. [226]	1		4	2
		"Larger employers (fifty or more employees) with workers who obtain exchange premium subsidies will be assessed between $2,000 and $3,000 for each worker. No penalties are assessed on firms with fewer than fifty full-time workers"	"Imposes fines on large employers (employers with more than 50 full-time employees) who fail to offer their full-time employees the opportunity to enroll in minimum essential coverage or who have a waiting period for enrollment of more than 60 days."	1513	Y	Y	On February 12, 2014, the IRS implemented this provision. [227, p. 8544] On July 31, 2015, PL 114-41 (Surface Transportation and Veterans Health Care Choice Improvement Act of 2015) "Amended the definition of applicable large employer to exclude hours worked by individuals receiving care under the TRICARE program or individuals enrolled and receiving coverage through certain Department of Veteran…	1		3	1
HCERA	"The employer-responsibility policy is changed to subtract the first thirty full-time employees from the payment calculation. The provision changes the payment amount for firms that do not offer coverage to $3,000 per full-time employee. Employers who offer coverage but whose employees receive tax credits will see the aggregate cap on payments increased to $2,000. Also, the assessment for workers…	"The employer-responsibility policy is changed to subtract the first thirty full-time employees from the payment calculation."	"Revises the provisions setting forth penalties to be imposed on employers with 50 or more employees who decline to offer employees health care coverage to allow an exemption for the first 30 employees (including part-time employees) when calculating the penalty."	1003	N	Y	On February 12, 2014, the IRS implemented this provision. [227, p. 8544]	0				Modifies provision directly above
		"The provision changes the payment amount for firms that do not offer coverage to $3,000 per full-time employee."	Not mentioned	1003(b)(1)	N	Y	On February 12, 2014, the IRS implemented this provision. [227, p. 8544]	0
		"Employers who offer coverage but whose employees receive tax credits will see the aggregate cap on payments increased to $2,000."	"Increases the applicable penalty amount per employee to $2,000."	1003(b)(2)	N	Y	On February 12, 2014, the IRS implemented this provision. [227, p. 8544]	0
		"Also, the assessment for workers in waiting periods is eliminated"	"Eliminates the assessment on large employers with extended waiting periods for enrollment in employer-sponsored plans."	1003	N			0	Y
1	"A “free choice” voucher allowing any worker whose premium for employer coverage would cost between 8 and 9.8 percent of income to buy insurance through an exchange and to use the employer contribution to lower the cost (section 1515)."		Is actually §10108 (see §10108)	10108				0
1	"prohibits discrimination against individuals or organizations that do not support assisted suicide (section 1553);"		"Prohibits the federal government, any state or local government or health care provider that receives federal financial assistance under this Act, or any health plan created under this Act from discriminating against an individual or institutional health care entity on the basis that such individual or entity does not provide a health care item or service furnished for the purpose of causing, or…	1553	N		As of at least as early as November 27, 2015, complaints under this provision have been fileable with the Office of Civil Rights. [230] On January 26, 2018, HHS issued a proposed rule that, if/when finalized, would affect this provision (among others), but it was already in effect. [228, p. 3891; 229]	1		4	2
1	"prohibits the HHS secretary from limiting access to health care services (section 1554);"		"Prohibits the Secretary from promulgating any regulation that: (1) creates an unreasonable barrier to the ability of individuals to obtain appropriate medical care; (2) impedes timely access to health care services; (3) interferes with communications regarding a full range of treatment options between the patient and the health care provider; (4) restricts the ability of health care providers to…	1554	N	N		0	Y
1	"guarantees that no individual, business, or insurer must participate in any federal program created under the Act (section 1555);"		"Declares that no individual, company, business, nonprofit entity, or health insurance issuer offering group or individual health insurance coverage shall be required to participate in any federal health insurance program created by or expanded under this Act. Prohibits any penalty from being imposed upon any such issuer for choosing not to participate in any such program."	1555	N			0	Y
1	"changes the Black Lung Benefits Act (section 1556);"		"Amends the Black Lung Benefits Act, with respect to claims filed on or after the effective date of the Black Lung Benefits Amendments of 1981, to eliminate exceptions to: (1) the applicability of certain provisions regarding rebuttable presumptions; and (2) the prohibition against requiring eligible survivors of a miner determined to be eligible for black lung benefits to file a new claim or to …	1556	N		On September 25, 2013, the Office of Workers' Compensation Programs implemented this provision. [231, p. 59102]	1		4	2
1	"protects individuals against discrimination on the basis of sex, race, national origin, disability, or age in health programs or activities (section 1557);"		"Prohibits discrimination by any federal health program or activity on the grounds of race, color, national origin, sex, age, or disability."	1557	N		On May 18, 2016, the Office of Civil Rights and HHS implemented this provision. [232, p. 31376]	1		4	2
1	"prohibits any employer from firing or discriminating against any worker because the employee received a premium tax credit (section 1558)."		"Amends the Fair Labor Standards Act of 1938 to prohibit an employer from discharging or discriminating against any employee because the employee: (1) has received a health insurance credit or subsidy; (2) provides information relating to any violation of any provision of such Act; or (3) objects to, or refuses to participate in, any activity, policy, practice, or assigned task that the employee …	1558	N		On February 27, 2013, the Occupational Safety and Health Administration (OSHA) implemented this provision. [233, p. 13222]	1		4	2
2	"Eligibility: In all states by 2014, Medicaid will be open for all individuals not previously eligible—chiefly non-elderly, non-pregnant, childless adults—with household incomes at or below 133 percent of the federal poverty level (that is, up to $14,404 for a single adult in 2010, $29,327 for a family of four). Actually, because the first 5 percent of every enrollee’s income is not counted, the …	"In all states by 2014, Medicaid will be open for all individuals not previously eligible—chiefly non-elderly, non-pregnant, childless adults—with household incomes at or below 133 percent of the federal poverty level (that is, up to $14,404 for a single adult in 2010, $29,327 for a family of four). Actually, because the first 5 percent of every enrollee’s income is not counted, the new national …	"Amends title XIX (Medicaid) of the SSA to extend Medicaid coverage, beginning in calendar 2014, to individuals under age 65 who are not entitled to or enrolled in Medicare and have incomes at or below 133% of the federal poverty line. Grants a state the option to expand Medicaid eligibility to such individuals as early as April 1, 2010."	2001	N	Y	On March 23, 2012, CMS implemented this provision. [235, p. 17144] However, this provision of Title II was not fully realized because of the Supreme Court Decision in NFIB v Sebelius [280]	1		2	1		3.125	1.5625	0.78125	17
		"Income eligibility for Medicaid will be determined by a new uniform national standard called “modified adjusted gross income”—the same standard to be used by health exchanges to determine eligibility for subsidies for individuals and families with incomes between 134 and 400 percent of the federal poverty level"	Not mentioned	2001				1		4	2
		The federal government will pay states for the costs of services to newly Medicaid-eligible individuals at these rates: 100 percent in 2014, 2015, and 2016; 95 percent in 2017; 94 percent in 2018; 93 percent in 2019; and 90 percent thereafter.	"Provides that, for between 2014 and 2016, the federal government will pay 100% of the cost of covering newly-eligible individuals." "Increases the federal medical assistance percentage (FMAP): (1) with respect to newly eligible individuals; and (2) between January 1, 2014, and December 31, 2016, for states meeting certain eligibility requirements."	2001(a)(3)(B)	N	Y	On April 2, 2013, CMS implemented this provision. [234, p. 19919]	1		4	2
		"For states that have already expanded coverage to the new populations, additional federal support will be phased in so that by in 2019, the “expansion states” will receive the same payment as other states for the newly eligible."	*Not mentioned	2001				1		4	2
		"A $200 million “special adjustment” is provided for states that have experienced a major statewide disaster. Only Louisiana meets the threshold as of the signing of the ACA"	*Not mentioned	2006			This provision is complicated; see background discussion here: [281] CRS Report on FMAP [282, p. 8] and also [6]	1		3	1
HCERA	"The provision for a permanent 100 percent federal matching rate for Nebraska for Medicaid costs of newly eligible individuals is struck. Federal Medicaid matching payments for the costs of services to newly eligible individuals are set at the following rates: 100 percent in 2014, 2015, and 2016; 95 percent in 2017; 94 percent in 2018; 93 percent in 2019; and 90 percent thereafter. Beginning in 2…	"The provision for a permanent 100 percent federal matching rate for Nebraska for Medicaid costs of newly eligible individuals is struck."	"Amends SSA title XIX (Medicaid), as amended by PPACA, to repeal the permanent 100% federal matching rate (federal medical assistance percentage [FMAP]) for Nebraska for the Medicaid costs of newly eligible mandatory individuals (expansion populations)."	1201(1)(B)	N		Does not require implementation (removes a provision).	0	Y
		"Federal Medicaid matching payments for the costs of services to newly eligible individuals are set at the following rates: 100 percent in 2014, 2015, and 2016; 95 percent in 2017; 94 percent in 2018; 93 percent in 2019; and 90 percent thereafter."	"Provides federal Medicaid matching payments for the costs of services to expansion populations at the following rates in all states: (1) 100% in 2014, 2015, and 2016; (2) 95% in 2017; (3) 94% in 2018; (4) 93% in 2019; and (5) 90% thereafter."	1201(1)(B)				0		Bundled with provision above
		"Beginning in 2019, expansion states will receive the same federal Medicaid payments as other states for newly eligible and previously eligible nonpregnant childless adults"	"Reduces, in the case of expansion states, the state share of the costs of covering nonpregnant childless adults by 50% in 2014, 60% in 2015, 70% in 2016, 80% in 2017, 90% in 2018."	1201	N			0		Bundled with provision above
2	"CHIP: All states must maintain their CHIP eligibility levels at least through September 30, 2019. Between 2016 and 2019, states will receive a 23 percent increase in their CHIP federal matching rate (currently between 65 and 83 percent), capped at 100 percent (section 2101, Subtitle B)."	"Between 2016 and 2019, states will receive a 23 percent increase in their CHIP federal matching rate (currently between 65 and 83 percent), capped at 100 percent"	"Amends SSA title XXI (State Children's Health Insurance Program) (CHIP, formerly known as SCHIP) to increase the FY2016-FY2019 enhanced FMAP for states, subject to a 100% cap."	2101(a)	Y	Y	On December 2, 2014, HHS issued a notice confirming implementation of this provision. [236, p. 71427] On January 22, 2018, PL 115-120 (Making further continuing appropriations for the fiscal year ending September 30, 2018, and for other purposes) "Extended the increased enhanced federal medical assistance percentage (E-FMAP) for CHIP for one year at 11.5 percentage points."	1		4	2
		"All states must maintain their CHIP eligibility levels at least through September 30, 2019."	"Prohibits states from applying, before the end of FY2019, CHIP eligibility standards that are more restrictive than those under this Act."	2101(b)	N		On February 25, 2011, CMS implemented this provision. [237, p.1, 3]	1		4	2
2	"A Community First Choice Option establishes an optional state Medicaid benefit, beginning October 1, 2011, to provide community-based attendant services and support for Medicaid beneficiaries with disabilities who otherwise would require care in a hospital, nursing home, or intermediate care facility for the mentally retarded [+$6B] (section 2401, Subtitle E)."		"Authorizes states to offer home and community-based attendant services and supports to Medicaid beneficiaries with disabilities who would otherwise require care in a hospital, nursing facility, intermediate care facility for the mentally retarded, or an institution for mental diseases."	2401	N	Y	On May 7, 2012, CMS implemented this provision. [238, p. 26828]	1		4	2
2	"Drug rebates: The drug manufacturer’s required rebate for brand-name outpatient prescription drugs will increase from 15.1 to 23.1 percent, and for generics from 11 to 13 percent. All additional revenues generated will be used to help pay for the ACA, generating $38 billion over ten years [−$38.1B] (section 2501, Subtitle F)."		"Amends SSA title XIX (Medicaid) to: (1) increase the minimum rebate percentage for single source drugs and innovator multiple source drugs; (2) increase the rebate for other drugs; (3) require contracts with Medicaid managed care organizations to extend prescription drug rebates (discounts) to their enrollees; (4) provide an additional rebate for new formulations of existing drugs; and (5) set a…	2501	N	Y	On February 1, 2016, CMS implemented this provision. [239, p. 5171]	1		4	2
2	"Disproportionate Share Hospital Payments: Medicaid DSH payments to hospitals that provide greater than average medical services to Medicaid, CHIP, uninsured, or other low-income patients will be reduced by $14.1 billion over five years beginning in 2014. No state will receive less than 35 percent of its 2012 allotment [−$14B] (section 2551, Subtitle G)."		"Reduces state disproportionate share hospital (DSH) allotments, except for Hawaii, by 50% or 35% once a state's uninsured rate decreases by 45%, depending on whether they have spent at least or more than 99.9% of their allotments on average during FY2004-FY2008. Requires a reduction of only 25% or 17.5% for low DSH states, depending on whether they have spent at least or more than 99.9% of their…	2551	Y	Y	On February 22, 2012, PL 112-96 (Middle Class Tax Relief and Job Creation Act of 2012) "Extended the Medicaid DSH allotment reductions by one year through FY2021." On January 2, 2013, PL 112-240 (American Taxpayer Relief Act of 2012) "Extended the Medicaid DSH allotment reductions by one year through FY2022." [6] On September 18, 2013, CMS implemented this provision. [240, p. 57293] On December 2…	1		1	1	Congress has repeatedly postponed DSH cuts (were scheduled to start in FY 2014). For more detail: [292]
HCERA	"The reduction in federal Medicaid disproportionate-share hospital payments is lowered from $18.1 billion to $14.1 billion and will begin in fiscal year 2014 [+$4.1B] (section 1203)."		"Lowers the reduction in federal Medicaid DSH payments and advances the reductions to begin in FY2014."	1203(a)(2)(7)(A)(ii)				0				In both [2] and [259], the "aggregate reductions in DSH allotments for all States under clause (i)(I) shall be equal to..." a total of $18.1 billion, not $14.1 billion.
2	"Dual Eligibles: “Duals” are individuals enrolled in both Medicaid and Medicare—one of the most expensive groups of enrollees in both programs, including senior citizens with low incomes and disabled persons under age sixty-five who meet the standards for both programs. This section directs the HHS secretary to establish a federal Coordinated Health Care Office within the Centers for Medicare and…		"Directs the Secretary to establish a Federal Coordinated Health Care Office to bring together officers and employees of the Medicare and Medicaid programs at the Centers for Medicare and Medicaid Services (CMS) to: (1) integrate Medicaid and Medicare benefits more effectively; and (2) improve the coordination between the federal government and states for dual eligible individuals to ensure that …	2602	N	Y	On December 30, 2010, CMS issued a notice confirming implementation of this provision. [241, p. 82405]	1		4	2
2	"establishing new adult health quality measures [+$300M] (section 2701);"		"Amends SSA title XI, as modified by CHIPRA, to direct the Secretary to: (1) identify and publish a recommended core set of adult health quality measures for Medicaid eligible adults"	2701	Y But concerned funding for a different provision (2701(b)(5) program)	Y	On January 4, 2012, HHS implemented this provision. [242, p. 286]	1		4	2
2	"prohibiting Medicaid payments for services related to health-care-acquired conditions such as infections (section 2702);"		"Requires the Secretary to identify current state practices that prohibit payment for health care-acquired conditions and to incorporate them, or elements of them, which are appropriate for application in regulations to the Medicaid program. Requires such regulations to prohibit payments to states for any amounts expended for providing medical assistance for specified health care-acquired conditi…	2702	N		On June 6, 2011, CMS implemented this provision. [243, p. 32816]	1		4	2
2	"allowing states to enroll Medicaid beneficiaries with chronic conditions in a “health home” to provide care coordination by a health team [+$700M] (section 2703);"		"Gives states the option to provide coordinated care through a health home for individuals with chronic conditions."	2703	N		On November 16, 2010, CMS implemented this provision. [244]	1		4	2
2	"creating a demonstration project to study bundled payments for hospitals and physicians (section 2704);"		"Directs the Secretary to establish a demonstration project to evaluate the use of bundled payments for the provision of integrated care for a Medicaid beneficiary: (1) with respect to an episode of care that includes a hospitalization; and (2) for concurrent physicians services provided during a hospitalization."	2704	N		On December 18, 2015, the CRS reported that this provision was not implemented. [245, p. 7]	1		0	0
2	"creating a demonstration project to test new payment structures for safety-net hospitals (section 2705);"		"Requires the Secretary to establish a Medicaid Global Payment System Demonstration Project under which a participating state shall adjust payments made to an eligible safety net hospital or network from a fee-for-service payment structure to a global capitated payment model. Authorizes appropriations."	2705	N		Not funded as of mid-2015 [283]	1		0	0
2	"creating a demonstration project to allow pediatric providers to be paid as “accountable care organizations” similar to the Accountable Care Organization demonstration in Medicare in Title III (section 2706)."		"Directs the Secretary to establish the Pediatric Accountable Care Organization Demonstration Project to authorize a participating state to allow pediatric medical providers meeting specified requirements to be recognized as an accountable care organization for the purpose of receiving specified incentive payments. Authorizes appropriations."	2706	N		Not funded as of mid-2015 [283]	1		0	0
3	"Quality reporting: Beginning in 2014, physicians who do not submit data to the Physician Quality Reporting Initiative to assess the quality of the care they deliver will have their Medicare payments reduced [−$100M] (section 3002, Subtitle A)."		"Prescribes an incentive (penalty) for providers who do not report quality measures satisfactorily, beginning in 2015."	3002(b)	N	Y	On November 16, 2012, HHS implemented this provision. [143]	1		4	2		3.82857	1.91429	0.957143	35
3	"A new national quality-reporting system is established for long-term care hospitals, inpatient rehabilitation hospitals, inpatient psychiatric hospitals, hospice programs, and certain cancer hospitals; nonparticipating providers will see payment reductions [−$100M] (sections 3004 and 3005, Subtitle A)."	"A new national quality-reporting system is established for long-term care hospitals, inpatient rehabilitation hospitals, inpatient psychiatric hospitals, hospice programs..."	"Requires long-term care hospitals, inpatient rehabilitation hospitals, and hospices, starting in rate year 2014, to submit data on specified quality measures. Requires reduction of the annual update of entities which do not comply."	3004	N		On August 31, 2012, HHS reported that this provision had been implemented. [145, p. 53502]	1		4	2
		"A new national quality-reporting system is established for... certain cancer hospitals;"	"Directs the Secretary, starting FY2014, to establish quality reporting programs for inpatient cancer hospitals exempt from the prospective payment system."	3005	N		On August 31, 2012, HHS implemented this provision. [145]	1		4	2
3	"CMS innovation: A new Center for Medicare and Medicaid Innovation is established within the federal Centers for Medicare and Medicaid Services (CMS) to research, develop, test, and expand innovative payment and delivery arrangements to improve quality and reduce the cost of care provided to patients [−$1.3B] (section 3021, Subtitle A)."		"Creates within CMS a Center for Medicare and Medicaid Innovation to test innovative payment and service delivery models to reduce program expenditures while preserving or enhancing the quality of care furnished to individuals. Makes appropriations for FY2010-FY2019."	3021	N		On November 16, 2010, CMI was established. [58]	1		4	2
3	"Shared savings: A program is established to share savings with Medicare providers to reward organizations that take responsibility for the cost and quality of care received by their patients; these organizations will be called accountable care organizations (ACOs) [−$4.9B] (section 3022, Subtitle A)."		"Directs the Secretary to establish a shared savings program that: (1) promotes accountability for a patient population; (2) coordinates items and services under Medicare parts A and B; and (3) encourages investment in infrastructure and redesigned care processes for high quality and efficient service delivery."	3022	N	Y	On November 2, 2011, HHS implemented this provision. [74]	1		4	2
3	"Bundling: A national pilot program on payment bundling will be developed by 2013 to encourage hospitals, doctors, and post-acute-care providers to combine their current separate payments into “bundles” to improve patient care and achieve savings (section 3023, Subtitle A)."		"Directs the Secretary to establish a pilot program for integrated care (involving payment bundling) during an episode of care provided to an applicable beneficiary around a hospitalization in order to improve the coordination, quality, and efficiency of health care services."	3023	N		On August 23, 2011, CMS reported, "CMS may be implementing the National Pilot Program required by the Affordable Care Act to be in place by January 1, 2013 [(this provision)] at a later date. The Bundled Payments for Care Improvement initiative is a separate initiative being undertaken under the Innovation Center’s authority. It is designed to provide opportunities for care improvement that are c…	1		2	1
3	"Hospital readmissions: Hospitals that have high levels of preventable patient readmissions will face reduced payments based on the cost of each hospital’s potentially preventable Medicare readmissions [−$7.1B] (section 3025, Subtitle A)."		"Requires the Secretary to establish a hospital readmissions reduction program involving certain payment adjustments, effective for discharges on or after October 1, 2012, for certain potentially preventable Medicare inpatient hospital readmissions."	3025	N		On August 18, 2011, HHS implemented this provision. [58, 146]	1		4	2
3	"A hospital value-based purchasing program will start in 2013 to tie hospital payments to performance on quality measures (section 3001)."		"Amends SSA title XVIII (Medicare) to direct the Secretary to establish a hospital value-based purchasing program under which value-based incentive payments are made in a fiscal year to hospitals that meet specified performance standards for a certain performance period."	3001	N	Y	On May 6, 2011, HHS implemented this provision. [58, 178]	1		4	2
3	"Medicare’s physician resource user feedback program will develop individualized reports by 2012 comparing physicians who see similar patients (section 3003)."		"Requires specified new types of reports and data analysis under the physician feedback program."	3003	N	Y	On November 29, 2010, HHS implemented this provision. [179]	1		4	2
3	"Starting in FY 2015, hospitals in the top 25th percentile of rates of hospital-acquired conditions for high-cost and common conditions will be penalized [−$1.4B] (section 3008)."		"Subjects hospitals to a penalty adjustment to hospital payments for high rates of hospital acquired conditions."	3008	N	Y	On August 19, 2013, HHS implemented this provision as the Hospital-Acquired Condition Reduction Program. [180]	1		4	2
3	"The HHS secretary will establish and update annually a national strategy to improve the delivery of health care services, patient outcomes, and population health (section 3011)."		"Amends the Public Health Service Act to direct the Secretary, through a transparent collaborative process, to establish a National Strategy for Quality Improvement in health care services, patient health outcomes, and population health, taking into consideration certain limitations on the use of comparative effectiveness data."	3011	N	Y	On March 21, 2011, HHS implemented this provision through the "National Strategy for Quality Improvement in Health Care." [70, 145]	1		4	2
3	"The president will convene an Interagency Working Group on Health Care Quality to develop quality initiatives as part of the national strategy (section 3012)."		"Directs the President to convene an Interagency Working Group on Health Care Quality."	3012	N		In March 2011, the Interagency Working Group on Health Care Quality convened for the first time. [71]	1		4	2
3	"A community-based-care transitions program will fund hospitals and community-based entities that offer evidence-based transition services to Medicare beneficiaries at high risk for readmission [+$500M] (section 3026)."		"Directs the Secretary to establish a Community-Based Care Transitions Program which provides funding to eligible entities that furnish improved care transitions services to high-risk Medicare beneficiaries."	3026	Y		In February 2012, this provision was implemented as the 5-year Community-based Care Transitions Program (CCTP). [81] On March 26, 2013, PL 113-6 (Consolidated and Further Continuing Appropriations Act, 2013) rescinded $200 million of funding transferred to the Program. [6]	1		4	2
3	"Home Health Care: The HHS secretary will restructure payments for home health services starting in 2014, achieving nearly $40 billion in payment reductions through 2019 [−$39.7B] (section 3131)."		"Requires the Secretary, starting in 2014, to rebase home health payments by an appropriate percentage, among other things, to reflect the number, mix, and level of intensity of home health services in an episode, and the average cost of providing care."	3131	N	Y	On December 2, 2013, HHS implemented this provision. [82]	1		4	2
3	"Disproportionate Share Hospital (DSH) payments: The secretary will update hospital payments in the Medicare DSH program to better account for hospitals’ uncompensated care costs. Starting in FY 2014, Medicare DSH payments will be reduced to reflect lower hospital uncompensated care costs due to increases in the numbers of insured [−$25.1B] (section 3133, Subtitle B)."		"Specifies reductions to Medicare DSH payments for FY2015 and ensuing fiscal years, especially to subsection (d) hospitals, to reflect lower uncompensated care costs relative to increases in the number of insured. (Generally, a subsection [d] hospital is an acute care hospital, particularly one that receives payments under Medicare's inpatient prospective payment system when providing covered inp…	3133	N	Y	On August 19, 2013, HHS implemented this provision. [180, p. 50620]	1		4	2
HCERA	"Cuts for Medicare disproportionate share hospitals will begin in fiscal year 2014 and the ten-year reduction is lowered by $3 billion [+$3B] (section 1104)."		"Amends SSA title XVIII (Medicare), as amended by PPACA, with respect to specified reductions to Medicare disproportionate share hospital (DSH) payments for FY2015 and ensuing fiscal years, especially to subsection (d) hospitals, to reflect lower uncompensated care costs relative to increases in the number of insured. (Generally, a subsection [d] hospital is an acute care hospital, particularly o…	1104 (amends PPACA §3133)	N	Y	On August 19, 2013, HHS implemented this provision. [180, p. 50620]	1		4	2
3	"The secretary will change hospice payments to improve payment accuracy in FY 2013 and impose requirements on hospice providers to increase accountability in Medicare [−$100M] (section 3132)."	"The secretary will change hospice payments to improve payment accuracy in FY 2013..."	"Directs the Secretary, not earlier than October 1, 2013, to implement, by regulation, budget neutral revisions to the methodology for determining hospice payments for routine home care and other services, which may include per diem payments reflecting changes in resource intensity in providing such care and services during the course of an entire episode of hospice care."	3132(a)	N	Y	On August 7, 2013, HHS implemented this provision. [182, p. 48238]	1		4	2
		"The secretary will... impose requirements on hospice providers to increase accountability in Medicare [−$100M] (section 3132)."	"Requires the Secretary to impose new requirements on hospice providers participating in Medicare, including requirements for: (1) a hospice physician or nurse practitioner to have a face-to-face encounter with the individual regarding eligibility and recertification; and (2) a medical review of any stays exceeding 180 days, where the number of such cases exceeds a specified percentage of them fo…	3132(b)	N	Y	On November 17, 2010, HHS implemented this provision. [89]	1		4	2
3	"The equipment-utilization factor for advanced imaging services is modified [−$2.3B] (section 3135)."		"Increases the presumed utilization rate for calculating the payment for advanced imaging equipment other than low-tech imaging such as ultrasound, x-rays and EKGs."	3135(a)	N	Y	On November 29, 2010, HHS implemented this provision. [138, p. 73390]	1		4	2
3	"The Medicare option to purchase power-driven wheelchairs with a lump-sum payment when the chair is supplied is eliminated. Medicare will make the same payments for power-driven chairs over a thirteen-month period [−$800M] (section 3136)."		"Restricts the lump-sum payment option for new or replacement chairs to the complex, rehabilitative power-driven wheelchairs only. Eliminates the lump-sum payment option for all other power-driven wheelchairs. Makes the rental payment for power-driven wheelchairs 15% of the purchase price for each of the first three months (instead of 10%), and 6% of the purchase price for each of the remaining 1…	3136	N	Y	On November 29, 2010, HHS implemented this provision. [183]]	1		4	2
3	"The secretary will recommend to Congress ways to reform the Medicare wage-index system by December 31, 2011, and will restore the hospital reclassification thresholds to the percentages used in FY 2009 [+$300M] (section 3137)."	"The secretary will... restore the hospital reclassification thresholds to the percentages used in FY 2009..."	0	3137(c)	N		No evidence of implementation found.
		"The secretary will recommend to Congress ways to reform the Medicare wage-index system by December 31, 2011...."	"Directs the Secretary to report to Congress a plan to reform the hospital wage index system."	3137(b)	N		On April 11, 2012, HHS implemented this provision. [90]	1		4	2
3	"Medicare Advantage: MA payments are frozen in 2011. Beginning in 2012, MA payment benchmarks are reduced. New benchmarks will vary from 95 percent of Medicare fee-for-service spending in high-cost areas to 115 percent in low-cost areas, with all benchmarks increased by 5 percent for high-quality plans [−$135.6B] (section 3201, Subtitle C)."	"MA payments are frozen in 2011."	Included in HCERA §1102 evaluation. (CRS summary exists for provision there, not for PPACA §3201.)					0
		"Beginning in 2012, MA payment benchmarks are reduced. New benchmarks will vary from 95 percent of Medicare fee-for-service spending in high-cost areas to 115 percent in low-cost areas, with all benchmarks increased by 5 percent for high-quality plans..."	0	3201(b)(2)	N	Y	On April 15, 2011, HHS implemented this provision. [94, p. 21483]	1		4	2
HCERA	"Medicare Advantage payments are frozen in 2011. Beginning in 2012, benchmarks are reduced relative to current levels. Benchmarks will vary from 95 percent of Medicare spending in high-cost areas to 115 percent in low-cost areas, with benchmarks increased for high-quality plans. "	"Medicare Advantage payments are frozen in 2011."	"Amends SSA title XVIII to freeze MA payments in 2011."	1102(b)(1) (amends PPACA §3201)	N	Y	On April 15, 2011, HHS implemented this provision. [94, p. 21546]	1		4	2
		"Beginning in 2012, benchmarks are reduced relative to current levels. Benchmarks will vary from 95 percent of Medicare spending in high-cost areas to 115 percent in low-cost areas, with benchmarks increased for high-quality plans."	Amends PPACA §3201. Already included in PPACA §3201 evaluation.					0
HCERA	"MA plans must spend at least 85 percent of revenue on medical costs or activities that improve quality of care, rather than for profit and overhead" (sections 1102-3).	"MA plans must spend at least 85 percent of revenue on medical costs or activities that improve quality of care, rather than for profit and overhead"	"Requires MA plans whose medical loss ratios are not at least .85 to remit to the Secretary an amount equal to a specified percentage of plan revenue. Requires the Secretary to: (1) prohibit enrollment in such a plan of new enrollees for three consecutive contract years; and (2) terminate the Medicare+Choice contract if the plan fails to have a .85 medical loss ratio for five consecutive contract…	1103	N	Y	On July 22, 2013, CMS implemented this provision. [261, p. 31284]	1		4	2
3	"MA plans may not charge beneficiaries more for cost sharing for covered services than what is charged under the fee-for-service program. Plans providing extra benefits must give priority to cost-sharing reductions, wellness, and preventive care, before benefits not covered under Medicare (section 3202)."	"MA plans may not charge beneficiaries more for cost sharing for covered services than what is charged under the fee-for-service program."	"Prohibits MA plans from charging beneficiaries cost sharing for chemotherapy administration services, renal dialysis services, or skilled nursing care that is greater than what is charged under the traditional fee-for-service program."	3202(a)	N	Y	On April 15, 2011, HHS implemented this provision. [94]	1		4	2
		"Plans providing extra benefits must give priority to cost-sharing reductions, wellness, and preventive care, before benefits not covered under Medicare..."	"Requires MA plans to apply the full amount of rebates, bonuses, and supplemental premiums according to the following order: (1) reduction of cost sharing, (2) coverage of preventive care and wellness benefits, and (3) other benefits not covered under the original Medicare fee-for-service program."	3202(b)	N	N	No evidence of implementation found.	0	Y
3	"MA beneficiaries may disenroll from an MA plan and return to the fee-for-service program from January 1 to March 15 of each year (section 3204)."		"Allows beneficiaries to disenroll from an MA plan and return to the traditional Medicare fee-for-service program from January 1 to March 15 of each year."	3204(a)	N	Y	On April 15, 2011, HHS implemented this provision. [94, p. 21442]	1		4	2
3	"Part D: Drug manufacturers will provide a 50 percent discount to Part D enrollees for brand-name drugs and biologics purchased during the coverage (“doughnut hole”) gap beginning January 1, 2011 [+$42.6B] (section 3301, Subtitle D)."		"Requires the manufacturer to participate in the Medicare coverage gap discount program. Directs the Secretary to establish such a program."	3301	N	Y	On April 12, 2012, HHS implemented this provision. [184, p. 22074]	1		4	2
HCERA	"A $250 rebate is provided for all Medicare Part D enrollees who enter the doughnut hole in 2010. The pharmaceutical makers' 50 percent discount on brand-name drugs beginning in 2011 is expanded to include new federal support to provide 75 percent coverage by 2020 to fill the doughnut hole [+$24.8B] (section 1101)."	"A $250 rebate is provided for all Medicare Part D enrollees who enter the doughnut hole in 2010."	"Amends part D (Voluntary Prescription Drug Benefit Program) of title XVIII (Medicare) of the Social Security Act (SSA) to direct the Secretary of HHS to provide a one-time $250 rebate in 2010 to all Medicare part D enrollees who enter the Medicare part D coverage gap (also known as the Medicare donut hole, the difference between the standard initial coverage limit and the catastrophic or out-of-…	1101 (amends PPACA §3301)	N		In 2010, CMS implemented this provision. [260]	1		4	2
		"The pharmaceutical makers' 50 percent discount on brand-name drugs beginning in 2011 is expanded to include new federal support to provide 75 percent coverage by 2020 to fill the doughnut hole"	"Amends SSA title XVIII, as amended by PPACA, to reduce the coinsurance percentage for covered brand-name and generic drugs to 25% by 2020 (thus closing the donut hole with 75% discounts)."	1101(b)(3) (amends PPACA §3301)	N	Y	On April 15, 2011, CMS implemented this provision. [94, p. 21478]	1		4	2
3	"The Part D premium subsidy is reduced for beneficiaries with incomes above Part B income thresholds [−$10.7B] (section 3308)."		"Requires part D enrollees who exceed certain income thresholds to pay higher premiums."	3308(a)	N	Y	On December 7, 2010, HHS implemented this provision. [185, p. 75891]	1		4	2
3	"Cost sharing is eliminated for beneficiaries receiving care under a home- and community-based waiver program who would otherwise require institutional care [+$1.1B] (section 3309)."		"Eliminates cost sharing for certain dual eligible individuals receiving care under a home and community-based waiver program who would otherwise require institutional care."	3309	N	Y	On April 15, 2011, HHS implemented this provision. [94, p. 21458]	1		4	2
3	"Part D plans must develop drug-dispensing techniques to reduce prescription drug waste in long-term care facilities [−$5.7B] (section 3310)."		"Directs the Secretary to require sponsors of prescription drug plans to utilize specific, uniform techniques for dispensing covered part D drugs to enrollees who reside in an long-term care facility in order to reduce waste associated with 30-day refills."	3310	N	Y	On April 15, 2011, HHS implemented this provision. [94, p. 21460]	1		4	2
3	"Market basket updates: A productivity adjustment is added to the market basket payment update for inpatient hospitals, home health providers, nursing homes, hospice providers, inpatient psychiatric facilities, long-term care hospitals, and inpatient rehabilitation facilities [−$156.6B] (section 3401)."		"... incorporates a full productivity adjustment into any [market basket] updates that do not already incorporate such adjustments, including inpatient hospitals, home health providers, nursing homes, hospice providers, inpatient psychiatric facilities, long-term care hospitals, inpatient rehabilitation facilities, and Part B providers."	3401	N		Since 2012, CMS has annually implemented this provision as appropriate. [263, 264]	1		4	2
HCERA	"The hospital market basket reduction is changed as follows: -0.3 in FY 2014 and -0.75 in FY2017, FY 2018, and FY 2019. Providers affected are inpatient hospitals, long-term care hospitals, inpatient rehabilitation facilities, psychiatric hospitals, and outpatient hospitals [-$9.9B] (section 1105)."		"Revises the hospital market basket reduction applicable to payments to inpatient hospitals, long-term care hospitals, inpatient rehabilitation facilities, psychiatric hospitals, and outpatient hospitals."	1105 (amends PPACA §3401)	N		Since 2012, CMS has annually implemented this provision as appropriate. [263, 264]	1		4	2
3	"Independent Payment Advisory Board: A new fifteen-member IPAB will present Congress with proposals to reduce excess cost growth and improve quality of care for Medicare beneficiaries. In years when Medicare costs are projected to be unsustainable (that is, exceeding the target growth rates), IPAB proposals will take effect unless Congress passes an alternative measure achieving the same level of…		"Establishes an Independent Payment Advisory Board to develop and submit detailed proposals to reduce the per capita rate of growth in Medicare spending to the President for Congress to consider."	3403	Y		On March 23, 2010, PPACA established the Board. [2] During its existence, the Board's activation condition (the five-year average growth rate of Medicare per-capita spending being projected to exceed the target growth rate) never occurred. [186] On February 9, 2018, PL 115-123 (Bipartisan Budget Act of 2018) repealed the Board. [6]	1		0	0
4	"Prevention and Public Health Investment Fund: A new dedicated fund will make a national investment in prevention and public health to improve health and restrain the growth in health care costs, with a dedicated, stable funding stream [+$12.9B] (section 4002)."		"Establishes a Prevention and Public Health Fund to provide for expanded and sustained national investment in prevention and public health programs to improve health and help restrain the rate of growth in private and public sector health care costs. Authorizes appropriations and appropriates money to such Fund."	4002	Y		On February 22, 2012, PL 112-96 (Middle Class Tax Relief and Job Creation Act of 2012) reduced appropriations to the Fund by $6.25 billion over FY 2013-2021. On December 13, 2016, PL 114-255 (21st Century Cures Act) reduced appropriations to the Fund by $3.5 billion over FY 2018-2024. On December 22, 2017, PL 115-96 (Third Continuing Appropriations for Fiscal Year 2018, Missile Defense, Health Pr…	1		2	1		3.35	1.7	0.85	19
4	"A new interagency federal council will set national prevention and health promotion strategies (section 4001)."		"Requires the President to... establish the National Prevention, Health Promotion and Public Health Council..."	4001	N	Y	On June 16, 2010, President Barack Obama implemented this provision. [187] Note that there is not a ton of substance here since all of the members are ex officio, largely cabinet members	1		4	2
4	"Two existing federal task forces—the U.S. Preventive Services Task Force and the U.S. Task Force on Community Preventive Services—are expanded and coordinated (section 4003)."	"the U.S. Preventive Services Task Force... [is] expanded and coordinated"	"Requires (currently, allows) the Director of AHRQ to convene the Preventive Services Task Force to review scientific evidence related to the effectiveness, appropriateness, and cost-effectiveness of clinical preventive services for the purpose of developing recommendations for the health care community."	4003(a)	N		In 1984, the USPSTF was created. [51] As of October 2018, the USPSTF remains active. [50]	1		4	2
		"the U.S. Task Force on Community Preventive Services... [is] expanded and coordinated"	"Requires the Director of CDC to convene an independent Community Preventive Services Task Force to review scientific evidence related to the effectiveness, appropriateness, and cost-effectiveness of community preventive interventions for the purpose of developing recommendations for individuals and organizations delivering populations-based services and other policy makers."	4003(b)	N		In 1996, the CPSTF was created. As of October 2018, the CPSTF remains active. [52]	1		4	2
4	"The HHS secretary will convene a national public-private partnership to conduct a national prevention and health promotion outreach and education campaign. Each state will design a public awareness campaign to educate Medicaid enrollees regarding preventive services (section 4004)."	""The HHS secretary will convene a national public-private partnership to conduct a national prevention and health promotion outreach and education campaign."	"Requires the Secretary to provide for the planning and implementation of a national public-private partnership for a prevention and health promotion outreach and education campaign to raise public awareness of health improvement across the life span."	4004(a)	N	N	Infeasible to evaluate for reasons similar to those stated in [8] ("Education and outreach for health promotion are core public health activities and a part of many HHS programs, authorized in broad language in the PHSA. Based on the absence of the links in an early document describing this activity, it is probably dead [270] Thus, it is not possible to identify total funding for Sec. 4004 implem…	1		1	1
		"Each state will design a public awareness campaign to educate Medicaid enrollees regarding preventive services"		4004(i)(2)	N	N	No evidence of implementation found.	0	Y	1	1
4	"Medicare Preventive Services: Medicare will cover, without co-payments or deductibles, an annual wellness visit and personalized prevention services, including a health-risk assessment [+$3.6B] (section 4103)."		"Amends SSA title XVIII (Medicare) to provide coverage of personalized prevention plan services, including a health risk assessment, for individuals. Prohibits cost-sharing for such services."	4103	N	Y	On November 24, 2010, HHS implemented this provision. [147, p. 71808]	1		4	2
4	"Medicare co-insurance will be waived for most preventive services, including any service given an A or B grade by the U.S. Preventive Services Task Force [+$800M] (section 4104)."		"Eliminates cost-sharing for certain preventive services recommended by the United States Preventive Services Task Force."	4104	N	Y	On November 24, 2010, HHS implemented this provision. [147, p. 71808]	1		4	2
4	"The secretary will conduct outreach regarding covered preventive services [−$700M] (section 4105)." NOTE: This is an inaccurate characterization of Section 4105! Actually what it does is allow the secretary to modify coverage of preventive services in Medicare and [271]potentially not pay for services with a grade of D or F (see text of the law). The CBO number of -$0.7B correctly reflects what …		"Authorizes the Secretary to modify Medicare coverage of any preventive service consistent with the recommendations of such Task Force."	4105	N			1		4	2
4	"Medicaid Preventive Services: State Medicaid programs may provide diagnostic, screening, preventive, and rehabilitation services including: (1) any clinical preventive service given an A or B grade by the U.S. Preventive Services Task Force; and (2) adult immunizations recommended by the Advisory Committee on Immunization Practices [+$100M] (section 4106)."		"Amends SSA title XIX (Medicaid) to provide Medicaid coverage of preventive services and approved vaccines."	4106	N		On February 1, 2013, HHS implemented this provision. [188]	1		4	2
4	"State Medicaid programs must cover counseling and pharmacotherapy for pregnant women for tobacco cessation with no cost-sharing [−$100M] (4107)."		"Provides for Medicaid coverage of counseling and pharmacotherapy for cessation of tobacco use by pregnant women."	4107	N		On June 24, 2011, HHS implemented this provision. [189]	1		4	2
4	"HHS will award grants to states to provide incentives for Medicaid beneficiaries to participate in healthy-lifestyle programs [+$100M] (section 4108)."		"Requires the Secretary to award grants to states to carry out initiatives to provide incentives to Medicaid beneficiaries who participate in programs to lower health risk and demonstrate changes in health risk and outcomes."	4108	N		In September 2011, 10 states were awarded 5-year Medicaid Incentives for Prevention of Chronic Diseases (MIPCD) grants. [54]	1		3	1
4	"A grant program will promote school-based health clinics to provide preventive and primary services to medically underserved children and families, with $50 million in funding each year for fiscal years 2010 to 2013 [+$200M] (section 4101)."		"Requires the Secretary to establish a program to award grants to eligible entities to support the operation of school-based health centers."	4101(a)	N		On February 7, 2017, CRS reported that $201 million had been obligated under this provision as of November 15, 2016. [7]	1		4	2
4	"Calorie Labeling on Chain Restaurant Menus: Any chain restaurant with twenty or more locations must disclose in written form the calories of each item on menus and the menu board, as well as information on total calories and the calories from fat, and the amounts of fat, saturated fat, cholesterol, sodium, carbohydrates, sugars, dietary fiber, and protein. These rules also apply to drive-up menu…		"Amends the Federal Food, Drug, and Cosmetic Act to require the labeling of a food item offered for sale in a retail food establishment that is part of a chain with 20 or more locations under the same name to disclose on the menu and menu board: (1) the number of calories contained in the standard menu item; (2) the suggested daily caloric intake; and (3) the availability on the premises and upon…	4205	N	Y	On December 1, 2014, HHS implemented this provision. [190]	1		4	2
4	"The HHS secretary will establish a Healthy Aging, Living Well program to improve the health of the pre-Medicare-eligible population [+$100M] (section 4202)."		"Requires the Secretary, acting through the Director of CDC, to award grants to state or local health departments and Indian tribes to carry out pilot programs to provide public health community interventions, screenings, and clinical referrals for individuals who are between 55 and 64 years of age."	4202(a)	N		On February 8, 2017, CRS reported that no appropriations to this provision from FY 2010-2017 were identified. [8]	1		0	0
4	"The U.S. Access Board will establish standards for the accessibility of medical diagnostic equipment for individuals with disabilities (section 4203)."		"Amends the Rehabilitation Act of 1973 to require the Architectural and Transportation Barriers Compliance Board to promulgate standards setting forth the minimum technical criteria for medical diagnostic equipment used in medical settings to ensure that such equipment is accessible to, and usable by, individuals with accessibility needs."	4203	N	Y	On January 9, 2017, the Architectural and Transportation Barriers Compliance Board implemented this provision. [191]	1		4	2
4	"All employers with fifty or more employees must provide break time and a place for breastfeeding mothers to express milk (section 4207)."		"Amends the Fair Labor Standards Act of 1938 to require employers to provide a reasonable break time and a suitable place, other than a bathroom, for an employee to express breast milk for her nursing child. Excludes an employer with fewer than 50 employees if such requirements would impose an undue hardship."	4207	N	Y	On December 21, 2010, the US Department of Labor posted a request for information from the public regarding this provision. [192] Based on the HHS and DoL websites, this provision appears to have been fully implemented without anything in the CFR; the web sites have sub-regulatory guidance (eg FAQ for employers) [272], [273]	1		4	2
4	"The HHS secretary, through the Centers for Disease Control and Prevention (CDC), shall fund research relating to public health services and systems (section 4301)."		"Requires the Secretary, acting through the Director of CDC, to provide funding for research in the area of public health services and systems."	4301	N	N	Infeasible to evaluate for reasons similar to those stated in [8] ("Education and outreach for health promotion are core public health activities and a part of many HHS programs, authorized in broad language in the PHSA. Thus, it is not possible to identify total funding for Sec. 4004 implementation.")	1		4	2
4	"Any ongoing or new federal health program must collect and report data by race, ethnicity, primary language, and any other indicator of disparity [+$200M] (section 4302)."		"Requires the Secretary to ensure that any federally conduced or supported health care or public health program, activity, or survey collects and reports specified demographic data regarding health disparities."	4302(a)	N		On October 31, 2011, HHS implemented this provision. [59]	1		4	2
4	"A childhood obesity demonstration program will be appropriated up to $25 million through 2014 (section 4306)."		"Appropriates funds to carry out childhood obesity demonstration projects."	4306	N		On April 16, 2015, PL 114-10 (Medicare Access and CHIP Reauthorization Act of 2015) appropriated an additional $10 million for FY 2016-2017. [7] On February 7, 2017, CRS reported that, as of November 15, 2016, $27 million had been obligated to implement this provision and that funding was "awarded to three research facilities to identify effective childhood obesity prevention strategies, and to a…	1		4	2
5	"National Health Care Workforce Commission: A permanent commission is established to review projected health care workforce needs and to provide comprehensive, unbiased information to Congress and the administration about how to align federal resources with national needs (Patty Murray, D-WA, and Jeff Bingaman, D-NM) (section 5101)."		"Establishes a National Health Care Workforce Commission to: (1) review current and projected health care workforce supply and demand; and (2) make recommendations to Congress and the Administration concerning national health care workforce priorities, goals, and policies."	5101	N		On March 23, 2010, PPACA established the Commission. [2] In September 2010, members were appointed to the Commission. [6] As of September 2018, no appropriation has been made for implementation of this provision, and the Commission has consequently never met. 257]	1		1	1		3.66667	1.88889	0.944444	9
5	"Medicare Payment for Primary Care: Beginning in 2011, all primary care practitioners and general surgeons who practice in health professional shortage areas will receive a 10 percent Medicare payment bonus for five years [+$3.5B] (section 5501)."	"Medicare Payment for Primary Care: Beginning in 2011, all primary care practitioners... who practice in health professional shortage areas will receive a 10 percent Medicare payment bonus for five years [+$3.5B] (section 5501)."	"Requires Medicare incentive payments to... primary care practitioners providing primary care services on or after January 1, 2011, and before January 1, 2016;"	5501(a)	N	Y	On November 29, 2010, HHS implemented this provision as the Primary Care Incentive Payment Program (PCIP). [138, p. 73432]	1		4	2
		"Medicare Payment for Primary Care: Beginning in 2011, all... general surgeons who practice in health professional shortage areas will receive a 10 percent Medicare payment bonus for five years [+$3.5B] (section 5501)."	"Requires Medicare incentive payments to... general surgeons performing major surgical procedures on or after January 1, 2011, and before January 1, 2016, in a health professional shortage area."	5501(b)	N	Y	On November 29, 2010, HHS implemented this provision as the HPSA Surgical Incentive Payment Program (HSIP). [138, p.73440]	1		4	2
5	"Community Health Center Medicare Payments: The HHS secretary will implement a prospective payment system for Medicare-covered services furnished by Federally Qualified Health Centers (Blanche Lincoln, D-AR; Olympia Snowe, R-ME; and Bingaman) [+$400M] (section 5502)."		"deleted by Sec. 10501"				N/A
5	"Primary Care: Beginning in 2011, the HHS secretary will redistribute residency positions that have been unfilled for primary care physician training [+$1.1B] (sections 5503 and 5504–6)."		"Reallocates unused residency positions to qualifying hospitals for primary care residents for purposes of payments to hospitals for graduate medical education costs."	5503	N	Y	On November 24, 2010, HHS implemented this provision. [147, p. 72147]	1		4	2
5	"Hospitals may receive indirect medical education and direct graduate medical education funding for residents who train in nonprovider settings so that time spent in a nonprovider setting may count (section 5504)."		"Revises provisions related to graduate medical education costs to count the time residents spend in nonprovider settings toward the full-time equivalency if the hospital incurs the costs of the stipends and fringe benefits of such residents during such time."	5504	N	Y	On November 24, 2010, HHS implemented this provision. [147, p. 72134]	1		4	2
5	"A grant program will help low-income individuals obtain education and training for health care occupations projected to experience labor shortages or high demand (Max Baucus, D-MT, and Herb Kohl, D-WI) [+$400M] (section 5507)."		"Requires the Secretary to... award grants for demonstration projects that are designed to provide certain low-income individuals with the opportunity to obtain education and training for health care occupations that pay well and that are expected to experience labor shortages or be in high demand;"	5507(a)"(2008)"(a)	Y		In 2010, the Administration for Children and Families implemented this provision as the Health Profession Opportunity Grants (HPOG) program. [37] On April 1, 2014, PL 113-93 (Protecting Access to Medicare Act of 2014) appropriated $85M to HPOG for FY 2015. On April 16, 2015, PL 114-10 (Medicare Access and CHIP Reauthorization Act of 2015) appropriated $85M to HPOG for each of FY 2015-2016. On Feb…	1		4	2
5	"A grant program will support primary care residency programs at teaching health centers (Jeff Bingaman) [+$200M] (section 5508)."		"Authorizes the Secretary to award grants to teaching health centers for the purpose of establishing new accredited or expanded primary care residency programs."	5508(a)	N	N	The program (THC GME, which stands for Teaching Health Center Graduate Medical Education) exists and has active grants [274]	1		4	2
10	"The National Health Services Corps is improved by increasing the loan repayment amount, allowing for half-time service and for teaching to account for up to 20 percent of the corps service commitment (Bernie Sanders, I-VT) (section 10501)."		"Revises provisions related to fulfillment of service obligations under the National Health Service Corps related to half-time clinical practice and teaching."	10501	N		CRS report on NHSC says half-time option is still a feature of the program as of 2018 [288]	1		4	2
5	"A program will increase graduate nurse education training under Medicare (Debbie Stabenow, D-MI) [+$200M] (section 5509)."		"Requires the Secretary to establish a graduate nurse education demonstration under which a hospital may receive payment for the hospital's reasonable costs for the provision of qualified clinical training to advance practice nurses."	5509	N		HHS implemented this provision as the Graduate Nurse Education Demonstration. On March 21, 2012, the Demonstration was announced. On July 30, 2012, the five sites participating in the Demonstration were announced. [44]	1		4	2
6	"Physician-owned hospitals without a provider agreement prior to December 31, 2010, may not participate in Medicare. Hospitals with a prior agreement may participate under new rules regarding conflicts, investments, patient safety, and expansions [−$500M] (section 6001)."		"Amends SSA title XVIII (Medicare) to prohibit physician-owned hospitals that do not have a provider agreement by August 1, 2010, to participate in Medicare. Allows their participation in Medicare under a rural provider and hospital exception to the ownership or investment prohibition if they meet certain requirements addressing conflict of interest, bona fide investments, patient safety issues, …	6001	N	Y	On November 24, 2010, HHS implemented this provision. [147, p. 72240]	1		4	2		3.5814	1.7907	0.895349	43
6	"The Physician Payments Sunshine Act. Drug, device, and biological and medical supply manufacturers must report transfers of value to physicians, medical practices, physician group practices, and teaching hospitals. Duplicative state and local laws are preempted, though not in the case of state or local laws beyond the section’s scope (section 6002)."		"Amends SSA title XI to require drug, device, biological and medical supply manufacturers to report to the Secretary transfers of value made to a physician, physician medical practice, a physician group practice, and/or teaching hospital, as well as information on any physician ownership or investment interest in the manufacturer. Provides penalties for noncompliance. Preempts duplicative state o…	6002	N	Y	On February 8, 2013, HHS implpemented this provision. [148, p. 9458]	1		4	2
6	"Nursing home transparency: Skilled nursing facilities (SNFs) under Medicare and nursing facilities (NFs) under Medicaid must provide information on ownership upon request by the secretary, the HHS inspector general, states, and state long-term care ombudsmen (section 6101)."		"Amends SSA title XI to require SNFs under Medicare and nursing facilities (NFs) under Medicaid to make available, upon request by the Secretary, the HHS Inspector General, the states, or a state long-term care ombudsman, information on ownership of the SNF or NF, including a description of the facility's governing body and organizational structure, as well as information regarding additional dis…	6101	N	Y	Proposed rule was issued on May 6, 2011 [284]. On August 8, 2011, HHS announced this provision would be implemented at a later date. [149, p.48486]	1		1	1
6	"SNFs and NFs must implement a compliance and ethics program for the facility’s employees and its agents within thirty-six months (section 6102)."		"Requires SNFs and NFs to operate a compliance and ethics program effective in preventing and detecting criminal, civil, and administrative violations."	6102"(1128I)"(b)	N	Y	On February 8, 2013, HHS implemented this provision. [150, p. 68802]	1		4	2
6	"The HHS secretary will publish standardized staffing data, links to state websites regarding survey and certification programs, a model complaint form, a summary of substantiated complaints, and the number of instances of criminal violations by a facility or its employees (section 6103)."		"Amends SSA title XVIII (Medicare) to require the Secretary to publish on the Nursing Home Compare Medicare website: (1) standardized staffing data; (2) links to state websites regarding state survey and certification programs; (3) the model standardized complaint form; (4) a summary of substantiated complaints; and (5) the number of adjudicated instances of criminal violations by a facility or i…	6103	N	N	As of October 2, 2018, this provision appears to have been implemented as all required information is identifiable on the Nursing Home Compare Medicare website. [127]	1		4	2
6	"The HHS secretary will require facilities to report staffing information uniformly, taking into account services provided by agency or contract staff (section 6106)."		"Amends SSA title XI to require the Secretary to develop a program for facilities to report direct care staffing information on payroll and other verifiable and auditable data in a uniform format based."	6106	N	Y	On August 4, 2015, HHS implemented this provision. [151, p. 46462]	1		4	2
6	"Nursing home enforcement and improvement: The HHS secretary will establish a national independent monitoring program to oversee interstate and large intrastate chains (section 6112)."		"Directs the Secretary to establish a demonstration project for developing, testing, and implementing a national independent monitor program to oversee interstate and large intrastate chains of SNFs and NFs."	6112	N	N	No evidence of implementation found.	1		0	0
6	"The administrator of a facility preparing to close must provide written notice to residents, their legal representatives, the state, the secretary, and the Long-Term Care Ombudsman program at least sixty days in advance. Facilities must prepare a closing plan for the state, which must approve it and ensure the safe transfer of residents (section 6113)."		"Requires the administrator of a SNF or a NF that is preparing to close to notify in writing residents, legal representatives of residents or other responsible parties, the Secretary, and the state long-term care ombudsman program in advance of the closure by at least 60 days. Requires the notice to include a plan for the transfer and adequate relocation of residents to another facility or altern…	6113	N	Y	On February 18, 2011, HHS implemented this provision. [153]	1		4	2
6	"Facilities must include dementia management and abuse prevention training in pre-employment training for staff, and if the secretary determines, for ongoing in-service training (section 6121)."		"Requires SNFs and NFs to include dementia management and abuse prevention training as part of pre-employment initial training and, if appropriate, as part of ongoing in-service training for permanent and contract or agency staff."	6121	N	Y	On October 4, 2016, HHS implemented this provision. [150, p. 68843]	1		4	2
6	"establishes a national program for federal and state background checks on direct patient access employees of long-term supports and services facilities and providers [+$100 M] (section 6201)."		"Requires the Secretary to establish a nationwide program for national and state background checks on prospective direct patient access employees of long-term care facilities and providers."	6201	N	Y	In 2010, HHS implemented this provision as the National Background Check Program and has since then awarded over $63M in grants to states. [154, p. 67501]	1		4	2
6	"sets up a public-private Patient-Centered Outcomes Research Institute to generate comparative clinical outcomes research. The institute will be governed by a public-private sector board appointed by the comptroller general to identify priorities and provide for the conduct of comparative outcomes research. The institute will ensure that patient subpopulations are accounted for in research design…		"Amends SSA title XI to establish the Patient-Centered Outcomes Research Institute to identify priorities for, and establish, update, and carry out, a national comparative outcomes research project agenda... Amends the Internal Revenue Code to establish in the Treasury the Patient-Centered Outcomes Research Trust Fund."	6301(a, d-e)	N	N	On March 23, 2010, PPACA established the Institute. [2] As of October 10, 2018, PCORI has awarded over $2 billion in award support. [155]	1		4	2
6	"The secretary will establish procedures to screen providers and suppliers participating in Medicare, Medicaid, and CHIP prioritized according to the risk of fraud, waste, and abuse for each provider or supplier category. All providers and suppliers will be subject to licensure checks. The secretary may impose additional screening. Providers and suppliers enrolling or reenrolling in Medicare, Med…	"The secretary will establish procedures to screen providers and suppliers participating in Medicare, Medicaid, and CHIP prioritized according to the risk of fraud, waste, and abuse for each provider or supplier category. All providers and suppliers will be subject to licensure checks. The secretary may impose additional screening."	"Amends SSA title XVIII (Medicare) to require the Secretary to: (1) establish procedures for screening providers and suppliers participating in Medicare, Medicaid, and CHIP; and (2) determine the level of screening according to the risk of fraud, waste, and abuse with respect to each category of provider or supplier."	6401(a)(3)"(1-4)	Y	Y	On February 2, 2011, HHS implemented this provision. [135]	1		4	2
		"Providers and suppliers enrolling or reenrolling in Medicare, Medicaid, or CHIP will be subject to new disclosure requirements [−$100 M] (section 6401)."	Requires providers and suppliers applying for enrollment or revalidation of enrollment in Medicare, Medicaid, or CHIP to disclose current or previous affiliations with any provider or supplier that: (1) has uncollected debt; (2) has had its payments suspended; (3) has been excluded from participating in a federal health care program; or (4) has had billing privileges revoked. Authorizes the Secre…	6401(a)(3)"(5)	Y	Y	On March 1, 2016, HHS published a proposed rule for implementation of this provision. [156] As of Spring 2018, HHS has not implemented this provision, and has announced plans to do so in March 2019. [157]	1		2	1
6	"Enhanced Medicare and Medicaid program integrity provisions [−$2.9 B] (section 6402). Data banks at the Centers for Medicare and Medicaid Services will include claims and payment data from Medicare, Medicaid, CHIP, health programs of the Social Security Administration, Departments of Veterans Affairs and Defense, and the Indian Health Service. The HHS secretary will create data-sharing agreement…	"Data banks at the Centers for Medicare and Medicaid Services will include claims and payment data from Medicare, Medicaid, CHIP, health programs of the Social Security Administration, Departments of Veterans Affairs and Defense, and the Indian Health Service."	"Requires CMS to include in the integrated data repository claims and payment data from Medicare, Medicaid, CHIP, and health-related programs administered by the Departments of Veterans Affairs (VA) and DOD, the Social Security Administration, and IHS."	6402(a)"(1128J)"(a)"(1)"(A)	N	N	Can't tell if this happened, suspect it would be an "invisible" change - that is, not public-facing, but one that would increase CMS ability to fight fraud, if it had happened.	0		?	?
		"The HHS secretary will create data-sharing agreements with the commissioner of Social Security, the secretaries of the VA and DOD, and the director of the IHS to identity fraud, waste, and abuse."	"Directs the Secretary to enter into data-sharing agreements with the Commissioner of Social Security, the VA and DOD Secretaries, and the IHS Director to help identity fraud, waste, and abuse."	6402(a)"(1128J)"(a)"(1)"(B)	N	N	See above	0		?	?
		"The HHS secretary will require that all Medicare, Medicaid, and CHIP providers include their National Provider Identifier numbers on enrollment applications."	"Directs the Secretary to issue a regulation requiring all Medicare, Medicaid, and CHIP providers to include their National Provider Identifier on enrollment applications."	6402(a)"(1128J)"(e)	N	Y	On May 5, 2010, HHS implemented this provision. [158]	1		4	2
		"The secretary will with-hold federal matching payments from states when the state does not report enrollee encounter data promptly."	"Authorizes the Secretary to withhold the federal matching payment to states for medical assistance expenditures whenever a state does not report enrollee encounter data in a timely manner to the state’s Medicaid Management Information System."	6402(c)	N	Y	On May 6, 2016, HHS implemented this provision. [159, p. 27737]	1		4	2
		"Providers and suppliers will be excluded for providing false information on any application to enroll or participate in a federal health care program. The use of civil monetary penalties is expanded to individuals who make false statements on applications or contracts to participate in a federal health care program, or who know of an overpayment and do not return the overpayment."	"Authorizes the Secretary to exclude providers and suppliers participation in any federal health care program for providing false information on any application to enroll or participate. Subjects to civil monetary penalties excluded individuals who: (1) order or prescribe an item or service; (2) make false statements on applications or contracts to participate in a federal health care program; or…	6402(d)	N	Y	On December 7, 2016, HHS implemented this provision. [160, p. 88335]	1		4	2
		"The HHS secretary may issue subpoenas and require the attendance and testimony of witnesses and the production of evidence in matters under investigation or in question by the secretary."	"Authorizes the Secretary to issue subpoenas and require the attendance and testimony of witnesses and the production of any other evidence that relates to matters under investigation or in question."	6402(e)	N	Y	On January 12, 2017, HHS implemented this provision. [161, p. 4110]	1		4	2
		"The HHS secretary shall consider the volume of billing for a durable medical equipment supplier or home health agency when determining the size of the surety bond."	"Requires the Secretary take into account the volume of billing for a durable medical equipment (DME) supplier or home health agency when determining the size of the supplier's and agency's surety bond."	6402(g)	N	N	Can't find any evidence on whether this happened or not.	0		?	?
		"The HHS secretary may suspend payments to a provider or supplier pending a fraud investigation."	"Authorizes the Secretary to suspend payments to a provider or supplier pending a fraud investigation."	6402(h)	N	Y	On February 2, 2011, HHS implemented this provision. [135, p. 5928]	1		4	2
		"Funding for the Health Care Fraud and Abuse Control is increased by $350 million over the next decade."	"Appropriates an additional $10 million, adjusted for inflation, to the Health Care Fraud and Abuse Control each of FY2011-FY2020."	6402(i)	N	N	[7]: "No public information located on ACA funding obligations."	1	In this case, money that goes into this account can be used for anti-fraud activities, so the question of whether this provision itself was implemented is inseparable from the larger assessent of how successful CMS anti-fraud efforts initiated under the ACA have been	4	2
HCERA	"Funding for the Health Care Fraud and Abuse Control program is increased by $250 million for 2010-19, and the fund is indexed based on consumer price increases [+$300M] (section 1303)."		"Makes additional appropriations to the Health Care Fraud and Abuse Control Account of the Federal Hospital Insurance Trust Fund for FY2011-FY2016."	1303(a)	N		[7]: "No public information located on ACA funding obligations."	1		4	2
6	"The HHS secretary will maintain a national health care fraud and abuse data collection program to report adverse actions against providers, suppliers, and practitioners and submit information to the National Practitioner Data Bank (section 6403)."		"Requires the Secretary to furnish the National Practitioner Data Bank (NPDB) with all information reported to the national health care fraud and abuse data collection program on certain final adverse actions taken against health care providers, suppliers, and practitioners."	6403	N	Y	On April 5, 2013, HHS implemented this provision. [137]	1		4	2
6	"Durable medical equipment or home health services must be ordered by a Medicare-eligible professional or physician enrolled in Medicare [−$400 M) (section 6405)."		"Requires DME or home health services to be ordered by an enrolled Medicare eligible professional or physician."	6405	N	Y	On May 5, 2010, HHS implemented this provision. [158]	1		4	2
6	"The HHS secretary may disenroll, for no more than one year, a Medicare-enrolled physician or supplier failing to maintain and provide access to written orders or requests for payment for DME, certification for home health services, or other referrals (section 6406)."		"Authorizes the Secretary to disenroll, for up to one year, a Medicare enrolled physician or supplier that fails to maintain and provide access to written orders or requests for payment for DME, certification for home health services, or referrals for other items and services."	6406	N	Y	On May 5, 2010, HHS implemented this provision. [158]	1		4	2
6	"Physicians must have a face-to-face encounter with an individual prior to issuing a certification for home health services or DME [−$1 B] (section 6407)."		"Requires a physician, nurse practitioner, clinical nurse specialist, certified nurse-midwife, or physician assistant to have a face-to-face encounter with an individual before issuing a certification for home health services or DME."	6407	N	Y	On November 17, 2010, HHS implemented this provision. [89]	1		4	2
6	"Persons who fail to grant HHS timely access to documents for audits, investigations, or evaluations may be subject to penalties of $15,000 for each day. Persons who knowingly make, use, or cause to be made or used any false statement to a federal health care program will be subject to a penalty of $50,000 for each violation (section 6408)."		"Revises civil monetary penalties for making false statements or delaying inspections."	6408	N	Y	On February 12, 2015 and December 7, 2016, HHS implemented this provision. [162, 160]	1		4	2
6	"HHS will expand the number of areas in the DME competitive bidding program from seventy-nine to one hundred of the largest metropolitan statistical areas, and to use competitively bid prices in all areas by 2016 [−$1.4 B] (section 6410)."		"Requires the Secretary to: (1) expand the number of areas to be included in round two of the competitive bidding program from 79 to 100 of the largest metropolitan statistical areas; and (2) use competitively bid prices in all areas by 2016."	6410	N	Y	On November 29, 2010, HHS implemented this provision. [138, p.73454, 73568]	1		4	2
6	"States must terminate individuals or entities from their Medicaid programs if they were terminated from Medicare or another state’s Medicaid program (section 6501)."		"Amends SSA title XIX (Medicaid) to require states to terminate individuals or entities (providers) from their Medicaid programs if they were terminated from Medicare or another state’s Medicaid program."	6501	N	Y	On February 2, 2011, HHS implemented this provision. [135, p. 5943]	1		4	2
6	"Medicaid agencies must exclude individuals or entities from participation for a period of time if the entity or individual owns, controls, or manages an entity that (1) has failed to repay overpayments; (2) is suspended, excluded, or terminated from participation in any state Medicaid program; or (3) is affiliated with an individual or entity that has been suspended, excluded, or terminated from…		"Requires Medicaid agencies to exclude individuals or entities from participating in Medicaid for a specified period of time if the entity or individual owns, controls, or manages an entity that: (1) has failed to repay overpayments during a specified period; (2) is suspended, excluded, or terminated from participation in any Medicaid program; or (3) is affiliated with an individual or entity tha…	6502	Y	N	On December 15, 2010, PL 111-309 (Medicare and Medicaid Extenders Act of 2010) repealed this provision. [6] No evidence of pre-repeal implementation found.	1		0	0
6	"Any agents, clearinghouses, or other payees that submit claims on behalf of providers must register with the state and the HHS secretary (section 6503)."		"Requires state Medicaid plans to require any billing agents, clearinghouses, or other alternate payees that submit claims on behalf of health care providers to register with the state and the Secretary."	6503	N	Y	On July 7, 2011, HHS announced implementation of this provision as being under development. [163, p. 40070] In Fall 2011, implementation of thus provision was withdrawn. [164]	1		0	0
6	"States may not pay for items or services provided under a Medicaid State plan or waiver to any financial institution or entity located outside of the U.S. (section 6505)."		"Requires a state Medicaid plan to prohibit the state from making any payments for items or services under a Medicaid state plan or a waiver to any financial institution or entity located outside of the United States."	6505	N	Y	On December 23, 2010, HHS implemented this provision through release of a Medicaid State Plan Preprint for Use by States When Implementing Section 6505 of the Affordable Care Act. [166]	1		4	2
6	"States will have up to one year to repay overpayments when a final determination of the amount of the overpayment has not been determined due to an ongoing judicial or administrative process [+$100 M] (section 6506)."		"Extends the period for states to recover overpayments from 60 days to one year after discovery of the overpayment."	6506	N	Y	On December 29, 2010, HHS implemented this provision. [167, p. 81885]	1		4	2
6	"States must make their Medicaid Management Information System methodologies compatible with Medicare’s national correct coding initiative [−$300 M] (6507)."		"Requires state mechanized Medicaid claims processing and information retrieval systems to incorporate methodologies compatible with Medicare’s National Correct Coding Initiative."	6507	N	Y	On September 1, 2010, HHS implemented this provision. [168, 169]	1		4	2
6	"States must implement new fraud, waste, and abuse programs before January 1, 2011 (section 6508)."		None	6508	N	N		0	Y			Specifies effective date for Subtltle F provisions
6	"Additional Medicaid Program Integrity Provisions addresses fraud and abuse issues in private health plans known as multiple employer welfare arrangements. MEWA employees and agents will be subject to criminal penalties if they provide false statements in marketing materials regarding a plan’s financial solvency, benefits, or regulatory status (section 6601)."		"Amends the Employee Retirement Income Security Act of 1974 (ERISA) to prohibit employees and agents of multiple employer welfare arrangements (MEWAs), subject to criminal penalties, from making false statements in marketing materials regarding an employee welfare benefit plan’s financial solvency, benefits, or regulatory status."	6601	N	Y	On March 1, 2013, HHS implemented this provision. [170]	1		4	2
6	"A model uniform reporting form will be developed by the National Association of Insurance Commissioners (section 6603)."		"Amends the Public Health Service Act to direct the Secretary to request NAIC to develop a model uniform report form for a private health insurance issuer seeking to refer suspected fraud and abuse to state insurance departments or other responsible state agencies for investigation."	6603	N	N	On April 3, 2012, NAIC adopted the Uniform Suspected Insurance Fraud Reporting Form. [165]	1		4	2
6	"The Department of Labor may issue summary cease-and-desist orders and summary seizure orders against plans in financially hazardous condition (section 6605)."		"Authorizes the Secretary of Labor to: (1) issue cease-and-desist orders to shut down temporarily the operations of MEWAs conducting fraudulent activities or posing a serious threat to the public, until hearings can be completed; and (2) seize a plan's assets if it appears that the plan is in a financially hazardous condition."	6605	N	Y	On March 1, 2013, HHS implemented this provision. [171]	1		4	2
6	"Elder Justice Act creates a national initiative to prevent and eliminate elder abuse, neglect, and exploitation. The HHS secretary will establish an Elder Justice Coordinating Council and Advisory Board to combat elder abuse, neglect, and exploitation. The secretary will make grants to operate mobile and stationary forensic centers regarding elder abuse, neglect, and exploitation. The secretary …	"The HHS secretary will establish an Elder Justice Coordinating Council and Advisory Board to combat elder abuse, neglect, and exploitation."					Most provisions of this part of the ACA (which stands alone as the Elder Justice Act) seem to have been implemented [285]	1		4	2
		"The secretary will make grants to operate mobile and stationary forensic centers regarding elder abuse, neglect, and exploitation."						1		4	2
		"The secretary will award grants to protect individuals seeking care in long-term care facilities and provide incentives for individuals to seek employment at such facilities;"						1		4	2
		"owners, operators, and some employees will be required to report suspected crimes committed at the facility."						1		4	2
		"The HHS secretary will establish an adult protective services grant program to enhance services by state and local governments."						1		4	2
		"The secretary will make grants to improve and provide training for Long-Term Care Ombudsman programs."						1		4	2
		"The secretary will help to establish a national training institute for federal and state surveyors of long-term care facilities (section 6703)."						1		4	2
6	"Medical Malpractice conveys the sense of the Senate that health reform presents an opportunity to address issues related to medical malpractice and medical-liability insurance. States should be encouraged to develop and test alternative models to the existing civil litigation system, and Congress should consider state demonstration projects to evaluate such alternatives (section 6801)."		"Expresses the sense of the Senate that: (1) health reform presents an opportunity to address issues related to medical malpractice and medical liability insurance; (2) states should be encouraged to develop and test alternative models to the existing civil litigation system; and (3) Congress should consider state demonstration projects to evaluate such alternatives."	6801	N	N		0	Y
10	"A State Demonstration Program to Evaluate Alternatives to Current Medical Tort Litigation is established. Grants will be available for up to five years to states to test alternatives to civil tort litigation. These models must emphasize patient safety, disclosure of health care errors, and early dispute resolution. Patients must be able to opt out of these alternatives (section 10607, added in M…		"Authorizes the Secretary to award demonstration grants to states for the development, implementation, and evaluation of alternatives to current tort litigation for resolving disputes over injuries allegedly caused by health care providers or health care organizations."	10607	Y	N	As of May 2016, HHS had awarded seven demonstration grants totaling $19.7 million. [172]	1		3	1
7	"Biologics Price Competition and Innovation directs the Food and Drug Administration to establish a process to license a biological product shown to be biosimilar to, or interchangeable with, a licensed biological product, called a reference product. The approval of an application for a biosimilar or interchangeable product is prohibited until twelve years from the date on which the reference pro…	"directs the Food and Drug Administration to establish a process to license a biological product shown to be biosimilar to, or interchangeable with, a licensed biological product, called a reference product."					https://www.finnegan.com/en/insights/the-patent-dance-article.htmlhttps://www.fda.gov/NewsEvents/Newsroom/PressAnnouncements/ucm628121.htm https://www.fda.gov/media/114574/downloadhttps://www.healthaffairs.org/do/10.1377/hpb20170721.487227/full/ https://www.finnegan.com/en/insights/the-patent-dance-article.htmlhttps://www.fda.gov/drugs/guidancecomplianceregulatoryinformation/ucm215089.htm	1		3	2		3	2	1	7
		"The approval of an application for a biosimilar or interchangeable product is prohibited until twelve years from the date on which the reference product is first approved by the FDA."						1		3	2
		"If the FDA approves a biological product on the grounds that it is interchangeable with a reference product, the agency may not make a determination that a subsequent biological product is interchangeable with that same reference product until at least one year after the first commercial marketing of the first interchangeable product."						1		3	2
		"The FDA may issue guidance with respect to the licensure of biological products under this new pathway, including patent-infringement concerns such as the exchange of information, good-faith negotiations, and initiation-infringement actions."						1		3	2
		"Certain provisions of the Food, Drug, and Cosmetic Act will apply to pediatric studies of biological products [−$7.0 B] (section 7002)."						1		3	2
7	"The treasury secretary, in consultation with the DHHS, will annually determine the amount of savings to the federal government as a result of this subtitle. The federal government savings will be used for deficit reduction (section 7003)."							1		3	2
7	"More Affordable Medicines for Children and Underserved Communities extends participation in the 340B program—which limits the price of outpatient drugs for designated entities such as community health centers—to certain children’s hospitals, cancer hospitals, critical access and sole community hospitals, and rural referral centers. It also exempts orphan drugs from required discounts for new 340…		"Expands the 340B drug discount program (a program limiting the cost of covered outpatient drugs to certain federal grantees) to allow participation as a covered entity by certain: (1) children's hospitals; (2) freestanding cancer hospitals; (3) critical access hospitals; (4) rural referral centers; and (5) sole community hospitals. Expands the program to include drugs used in connection with an …	7101	N	Y	On July 23, 2013, HHS implemented this provision. [173]	1		4	2
8	"Establishment of National Voluntary Insurance Program for Purchasing Community Living Services and Supports outlines the purposes and operations of the program [−$70.2B] (section 8002)."		"Establishes a national, voluntary insurance program for purchasing community living assistance services and supports (CLASS program) under which: (1) all employees are automatically enrolled, but are allowed to waive enrollment; (2) payroll deductions pay monthly premiums; and (3) benefits under a CLASS Independence Benefit Plan provide individuals with functional limitations with tools that wil…	8002	Y		On January 2, 2013, Title VIII of the Affordable Care Act was repealed by PL 112-240 (American Taxpayer Relief Act of 2012). [6]	1		0	0		0	0	0	1
9	"A new excise tax of 40 percent (the so-called “Cadillac” tax) is levied on insurance companies and plan administrators for any health coverage plan that is above a premium threshold of $10,200 for single coverage and $27,500 for family coverage beginning in 2018. The tax applies to self-insured plans and plans sold in the group market, but not to individual market plans (except when coverage is …		"Amends the Internal Revenue Code to impose an excise tax of 40% of the excess benefit from certain high cost employer-sponsored health coverage. Deems any amount which exceeds payment of $8,500 for an employee self-only coverage plan and $23,000 for employees with other than self-only coverage (family plans) as an excess benefit. Increases such amounts for certain retirees and employees who are …	9001	Y		On December 18, 2015, PL 114-113 (Consolidated Appropriations Act, 2016) amended this provision by allowing the excise tax to be deducted as a business expense and delayed implementation of this provision until TY 2020. On January 22, 2018, PL 115-120 (Making further continuing appropriations for the fiscal year ending September 30, 2018, and for other purposes) delayed implementation of this pro…	1		0	0		3.21053	1.57895	0.789474	19
HCERA	"A 40 percent excise tax (the "Cadillac" tax) is levied on insurance companies and plan administrators for any health coverage plan when its cost is above a threshold of $10,200 for single coverage and $27,500 for family coverage [+$32BG] (section 1401)."		"Increases the dollar thresholds for [the "Cadillac" tax] to $10,200 for self-only coverage and $27,500 for other than self-only coverage (family plans). "	HCERA 1401				0
9	"Employers must disclose the value of employer-provided health benefits for each employee’s health insurance coverage on the worker’s annual W-2 form (section 9002)."		"Requires employers to include in the W-2 form of each employee the aggregate cost of applicable employer-sponsored group health coverage that is excludable from the employee's gross income (excluding the value of contributions to flexible spending arrangements)."	9002	N	N	On March 29, 2011, the IRS implemented this provision via an interim guidance to remain in effect until further guidance is issued. [105] As of at least July 2018, no further guidance has been issued. [104]	1		4	2
9	"The definition of qualified medical expenses for health savings accounts (HSAs), flexible spending arrangements (FSAs), and health reimbursement arrangements (HRAs) will conform to the definition used for the medical-expense itemized deduction. Over-the-counter medicines obtained with a prescription will still be a qualified medical expense [+$5B] (section 9003)."		"Restricts payments from health savings accounts, medical savings accounts, and health flexible spending arrangements for medications to prescription drugs or insulin."	9003	N		On September 3, 2010, the IRS implemented this provision, effective January 1, 2011. [104, 174]	1		4	2
9	"The additional tax for HSA withdrawals prior to age sixty-five that are used for purposes other than qualified medical expenses is increased from 10 percent to 20 percent. The additional tax for Archer medical savings account (MSA) withdrawals not used for qualified medical expenses increases from 15 percent to 20 percent [+$1.4B] (section 9004)."		"Increases to 20% the penalty for distributions from a health savings account or Archer medical savings account not used for qualified medical expenses."	9004	N		On January 11, 2012, the IRS implemented this provision effective TY 2011 [111, p.1]	1		4	2
9	"The amount of contributions to health FSAs is limited to $2,500 per year beginning in 2013. The cap is indexed at CPI-U, the consumer price index–urban, in subsequent years [+$13B] (section 9005)."		"Limits annual salary reduction contributions by an employee to a health flexible spending arrangement under a cafeteria plan to $2,500."	9005	N		On June 25, 2012, the IRS implemented this provision effective TY 2013. [112]	1		4	2
9	"Businesses that pay any amount greater than $600 during the year to corporate and noncorporate providers of property and services must file an information report with each provider and with the IRS (this is the so-called 1099 provision). Information reporting is already required on payments for services to noncorporate providers [+$17.1B] (section 9006)."		"Applies to corporations reporting requirements for payments of $600 or more to persons engaged in a trade or business."	9006	Y		On April 14, 2011, PL 112-9 (Comprehensive 1099 Taxpayer Protection and Repayment of Exchange Subsidy Overpayments Act of 2011) repealed this provision. [6]	1		0	0
9	"A new annual fee is imposed on the pharmaceutical manufacturing sector: $2.5 billion in 2011, $2.8 billion in years 2012–13, $3.0 billion in 2014–16, $4.0 billion in 2017, $4.1 billion in 2018, and $2.8 billion in 2019 and years thereafter [+$27B] (section 9008)."		"Imposes an annual fee on the branded prescription drug sales exceeding $5 million of manufacturers and importers of such drugs beginning in 2010."	9008	N		On July 24, 2014, the IRS implemented this provision. [104, 267]	1		4	2
HCERA	"The fee on pharmaceutical manufacturers is changed to the following amounts: $2.5 billion in 2011, $2.8 billion in years 2012-13, $3.0 billion in years 2014-16, $4.0 billion in 2017, $4.1 billion in 2018, and $2.8 billion in 2019 and years thereafter [+$27B] (section 1404)."		"Delays until 2011 the fee on sales of branded prescription drugs. Sets forth a schedule of applicable amounts for 2011 through 2018 upon which such fee is based."	1404				0
9	"A new excise tax is imposed on the sale of medical devices by the manufacturer or importer equal to 2.3 percent of the sales price. The excise tax does not apply to sales of eyeglasses, contact lenses, hearing aids, or any other medical device of a type generally purchased by the public at retail [+$20B] (section 9009)."		"Imposes an annual fee on the gross sales receipts exceeding $5 million of manufacturers and importers of certain medical devices beginning in 2011."	9009	Y		On December 5, 2012, the IRS and Department of the Treasury implemented this provision. [104, 114] On December 18, 2015, PL 114-113 (Consolidated Appropriations Act, 2016) effected a moratorium on this tax from January 1, 2016 to December 31, 2017. [6] On January 22, 2018, PL 115-120 (Making further continuing appropriations for the fiscal year ending September 30, 2018, and for other purposes) e…	1		0	0
HCERA	"The fee on medical-device manufacturers is replaced with an excise tax on the sale of medical devices made by the manufacturer or sold from an importer equal to 2.3 percent of the sales price. The excise tax will not apply to the sale of eyeglasses, contact lenses, hearing aids, or any device generally purchased by the public at retail. The provision is effective for sales after December 31, 201…		"Imposes a tax on sales after 2012 of any taxable medical device by the manufacturer, producer, or importer equal to 2.3% of the price for which such device is sold. Defines "taxable medical device" as any device intended for humans, except eyeglasses, contact lenses, hearing aids, and any other medical device generally purchased by the general public at retail. Repeals the excise tax on medical …	1405	Y	Y	On December 7, 2012, the IRS implemented this provision. [268, p. 72924] On December 18, 2015, PL 114-113 (Consolidated Appropriations Act, 2016) "Established a two-year moratorium on the medical device excise tax beginning Jan. 1, 2016, and ending Dec. 31, 2017." On January 22, 2018, PL 115-120 (Making further continuing appropriations for the fiscal year ending September 30, 2018, and for other…	0
9	"An annual fee is assessed on the health insurance sector: $8.0 billion in 2014, $11.3 billion in years 2015–16, $13.9 billion in 2017, and $14.3 billion in 2018. This nondeductible fee is allocated across the industry according to market share and does not apply to companies whose net premiums are $50 million or less. The fee does not apply to any employer or governmental entity. Nonprofit insur…		"Imposes on any entity that provides health insurance for any United States health risk an annual fee beginning in 2011. Defines "United States health risk" as the health risk of an individual who is a U.S. citizen or resident or is located in the United States with respect to the period the individual is so located. Exempts entities whose net premiums written are not more than $25 million. Requi…	9010	Y		On November 26, 2013, the IRS and Department of the Treasury implemented this provision. [104, 176] On December 18, 2015, PL 114-113 (Consolidated Appropriations Act, 2016) suspended collection of this fee for CY 2017. On January 22, 2018, PL 115-120 (Making further continuing appropriations for the fiscal year ending September 30, 2018, and for other purposes) suspended collection of this fee fo…	1		2	1
HCERA	"The fee on health insurance providers is changed as follows: $8.0 billion in 2014, $11.3 billion in years 2015-16, $13.9 billion in 2017, and $14.3 billion in 2018 [+$60.1B] (section 1406)."		"Delays until 2014 the annual fee on the net premium income of health insurance providers. Allows a reduced fee for tax-exempt insurance providers. Sets forth a schedule of applicable amounts upon which such fee is based for calendar years between 2014 and 2018."	1406				0
9	"The deduction for the subsidy paid by the federal government to employers who maintain prescription drug plans for their Medicare Part D–eligible retirees is eliminated effective for taxable years beginning after December 31, 2012 [+$4.5B] (section 9012)."		"Eliminates the tax deduction for expenses for determining the subsidy for employers who maintain prescription drug plans for Medicare Part D eligible retirees."	9012	N		The IRS implemented this provision effective TY 2013. [104, 116]	1		4	2
9	"The adjusted gross income threshold for claiming the itemized deduction for medical expenses is increased from 7.5 to 10 percent. Individuals aged sixty-five and older may claim the itemized deduction for medical expenses at 7.5 percent of their adjusted gross income through 2016 [+$15.2B] (section 9013)."		"Increases the adjusted gross income threshold for claiming the itemized deduction for medical expenses from 7.5% to 10% beginning after 2012. Retains the 7.5% threshold through 2016 for individual taxpayers who have attained age 65 before the close of an applicable taxable year."	9013	Y		The IRS implemented this provision effective TY 2013. [104] On December 22, 2017, PL 115-97 (An Act to provide for reconciliation pursuant to titles II and V of the concurrent resolution on the budget for fiscal year 2018) returned the threshold to 7.5% for medical expenses for all taxpayers for 2017 and 2018. [43, 117]	1		3	1
9	"The deductibility of executive compensation under section 162(m) for insurance providers is limited if at least 25 percent of the insurance provider’s gross premium income from health business is derived from health insurance plans that meet minimum essential coverage requirements. The deduction is limited to $500,000 per taxable year and applies to all officers, employees, directors, and other …		"Imposes a limitation after December 31, 2012, of $500,000 on the deductibility of remuneration paid to officers, directors, employees, and service providers of health insurance issuers who derive at least 25% of their gross premiums from providing health insurance coverage that meets the minimum essential coverage requirements established by this Act."	9014	N	Y	On September 23, 2014, the IRS and Department of the Treasury implemented this provision. [104, 118] A non-technical summary and description is provided in this report [275]	1		4	2
9	"The hospital insurance tax rate is increased by 0.9 percentage points on an individual taxpayer earning more than $200,000 ($250,000 for married couples filing jointly). Revenues will be credited to the Health Insurance Trust fund. The hospital insurance tax will also include a 3.8 percent tax on income from interest, dividends, annuities, royalties, and rents on taxpayers with income above $200…		"Increases after December 31, 2012, the hospital insurance tax rate by .9% for individual taxpayers earning over $200,000 ($250,000 for married couples filing joint tax returns)."	9015	N		On November 26, 2013, the IRS and Department of the Treasury implemented this provision. [104, 119]	1		4	2
HCERA	"The tax treatment is equalized for earned and unearned income under the Medicare contribution for taxpayers with income above $200,000 ($250,000 for married couples filing jointly). The provision imposes a 3.8 percent tax on income from interest, dividends, annuities, royalties, and rents that are not derived in the ordinary course of trade or business, excluding active S corporation or partners…		"Includes net investment income in the Medicare taxable base and imposes a 3.8% tax on such income, beginning in 2013. Excludes from such tax the net investment income of taxpayers with adjusted gross incomes of less than $200,000 ($250,000 for joint returns). Defines "net investment income" to include interest, dividends, annuities, royalties, rents, passive income, and net gain from the disposi…	1402(a)	N	Y	On December 3, 2013, the IRS implemented this provision. [266, p. 72394]	1		4	2
9	"Nonprofit Blue Cross Blue Shield organizations must have a medical loss ratio of 85 percent or higher to take advantage of tax benefits provided to them under Internal Revenue Code section 833 [+$400M] (section 9016)."		"Requires Blue Cross or Blue Shield organizations or other nonprofit organizations that provide health insurance to reimburse at least 85% of the cost of clinical services provided to their enrollees to be eligible for special tax benefits currently provided to such organizations."	9016	N		On January 6, 2014, the IRS implemented this provision. [104, 120]	1		4	2
9	"Simple cafeteria-style plans are established so that small businesses can provide tax-free benefits to their employees. Self-employed individuals may be counted as qualified employees (section 9022)."		"Establishes a new employee benefit cafeteria plan to be known as a Simple Cafeteria Plan, defined as a plan that: (1) is established and maintained by an employer with an average of 100 or fewer employees during a two-year period; (2) requires employers to make contributions or match employee contributions to the plan; and (3) requires participating employees to have at least 1,000 hours of serv…	9022	N		On January 18, 2013, the IRS implemented this provision. [121]	1		4	2
9	"A two-year temporary tax credit subject to a $1 billion cap is established to encourage investments in new therapies to prevent, diagnose, and treat acute and chronic diseases [less than −$900M] (section 9023)."		"Allows a 50% tax credit for investment in any qualifying therapeutic discovery project, defined as a project that is designed to: (1) treat or prevent diseases by conducting pre-clinical activities, clinical trials, and clinical studies, or carrying out research projects to approve new drugs or other biologic products; (2) diagnose diseases or conditions to determine molecular factors related to…	9023	N		Applicants to the program were notified by letter dated October 29, 2010 whether their application for a credit or grant was approved, and if so what amount the applicant was eligible to take. [104] On December 31, 2013, the program concluded, and results are available online. [123] According to the IRS, grants totaling $970 million and tax credits totaling $17 million were awarded. [6]	1		4	2
10	"The adoption tax credit and adoption-assistance exclusion ($12,170 for 2009) is increased by $1,000, and the credit is made refundable [−$1.2B] (section 9025)."		"Increases from $10,000 to $13,170 the dollar limitation on: (1) the tax credit for adoption expenses; and (2) the tax exclusion for employer-provided adoption assistance. Allows an inflation adjustment to such limitation after 2010. Makes such credit refundable. Extends through 2011 the general terminating date of the Economic Growth and Tax Relief Reconciliation Act of 2001 with respect to such…	10909	N		On September 29, 2010, the IRS implemented this provision. [104, 177]	1		4	2
10	"A 10 percent tax is imposed on amounts paid for indoor tanning services. The tax is effective for services rendered on or after July 1, 2010 [+$2.7B] (section 9017)."		"Amends the Internal Revenue Code to impose a 10% excise tax on any amount paid for indoor tanning services on or after July 1, 2010. Exempts phototherapy services performed by a licensed medical professional from the definition of 'indoor tanning services.'"	10907	N		The IRS implemented this provision effective July 1, 2010. [104] Health Affairs blog post hails tanning tax as a public health success [291].	1		4	2
10	"Employers offering health coverage to their workers must provide free-choice vouchers to qualified employees if the worker wants to buy a qualified health plan through a state exchange. The voucher's value must equal the contribution the employer would have made to its own plan for the worker. Workers qualify if their required insurance premium contribution would be between 8 and 9.8 percent of …		"Requires an offering employer to provide free choice vouchers to each qualified employee. Defines "offering employer" to mean any employer who offers minimum essential coverage to its employees consisting of coverage through an eligible employer-sponsored plan and who pays any portion of the costs of such plan. Defines "qualified employee" as an employee whose required contribution for such cove…	10108	Y	N	On April 15, 2011, PL 112-10 repealed this provision. [6]	1		0	0		3.52941	1.76471	0.882353	17
10	"A financial incentive is created for states to shift Medicaid beneficiaries out of nursing homes and into home- and community-based services (Maria Cantwell, D-WA, and Herb Kohl, D-WI)" (section 10202)		"Creates a State Balancing Incentive Payments Program to increase the FMAP for states which offer home and community-based services as a long-term care alternative to nursing homes."	10202 (not 10102; [3] typo)	N		CMS implemented this provision as the Balancing Incentive Program. [246]	1		4	2
10	"A Pregnancy Assistance Fund will award competitive grants to states to assist pregnant and parenting teens and women (sections 10212-14)."		"Requires the Secretary to establish a Pregnancy Assistance Fund for grants to states to assist pregnant and parenting teens and women." "Authorizes appropriations for FY2010-FY2019."	10212-4	N		In 2010, HHS implemented this provision as the Pregnancy Assistance Fund. [247]	1		4	2
10	"The Indian Health Care Improvement Act is reauthorized, including programs to expand the Indian health care workforce, create innovative delivery models, improve behavioral health, enhance health promotion and disease prevention, improve access to services, construct facilities, and create a youth suicide prevention grant program (Byron Dorgan, D-ND) (section 10221)."		"Enacts into law the Indian Health Care Improvement Reauthorization and Extension Act of 2009 (S. 1790)."	10221	N			1		4	2
10	"Medicare coverage and screening will be provided to individuals exposed to environmental health hazards determined under the Comprehensive Environmental Response, Compensation, and Liability Act of 1980 (Max Baucus, D-MT) [+$300M] (section 10323)."		"Amends SSA title XVIII (Medicare) to deem eligible for Medicare coverage certain individuals exposed to environmental health hazards."	10323(a)	N		This happened [286]	1		4	2
10	"Beginning in 2011, Medicare hospital wage-index and geographic-practice expense floors are established for hospitals and physicians in states where at least 50 percent of the counties are frontier (Kent Conrad and Byron Dorgan, both D-ND) [+$2B] (section 10324)."		"Establishes floors: (1) on the area wage index for hospitals in frontier states; (2) on the area wage adjustment factor for hospital outpatient department services in frontier states; and (3) for the practice expense index for services furnished in frontier states."	10324	N	Y	On August 16, 2010, CMS implemented this provision. [248, p. 50160]	1		4	2
10	"The HHS secretary may test value-based purchasing programs for inpatient rehabilitation facilities, inpatient psychiatric hospitals, long-term care hospitals, certain cancer hospitals, and hospice providers (freshman senators) (section 10326)."		"Directs the Secretary to conduct separate pilot programs, for specified kinds of hospitals and hospice programs, to test the implementation of a value-based purchasing program for payments to the provider."	10326	N		It looks like CMS has moved forward with pay-for-reporting for inpatient psych hospitals and has at least some initiatives on value-based payments for hospice [287]	1		4	2
10	"The HHS secretary will develop a Physician Compare website where Medicare beneficiaries can compare measures of physician quality and patient experience (Susan Collins, R-ME, and Joe Lieberman, I-CT) (section 10331)."		"Requires the Secretary to... develop a Physician Compare website with information on physicians enrolled in the Medicare program and other eligible professionals who participate in the Physician Quality Reporting Initiative;"	10331	N	Y	On December 30, 2010, CMS implemented this provision. [250, p. 71116]	1		4	2
10	"The Office of Minority Health is codified within the DHHS. The National Center on Minority Health and Health Disparities at the National Institutes of Health (NIH) is upgraded from a center to an institute. The Offices of Minority Health will monitor health, health care trends, and quality of care among minority patients and evaluate the success of minority-health programs and initiatives (Ben C…		"Transfers the Office of Minority Health to the Office of the Secretary. Authorizes appropriations for FY2011-FY2016. Establishes individual offices of minority health within HHS. Redesignates the National Center on Minority Health and Health Disparities in NIH as the National Institute on Minority Health and Health Disparities."	10334	N	Y	On September 13, 2010, HHS implemented this provision. [251, p. 55582]	1		4	2
10	"The HHS secretary shall develop a national report card on diabetes, to be updated every two years (Kay Hagan, D-NC) (section 10407)."		"Requires the Secretary to prepare biennially a national diabetes report card and, to the extent possible, one for each state."	10407	N		In 2012, HHS implemented this provision with the release of the first biennial diabetes report card. [252]	1		4	2
10	"An NIH Cures Acceleration Network is created and authorized to award grants and contracts to accelerate the development of medical products and behavioral therapies (Arlen Specter, D-PA) (section 10409)."		"Amends the Public Health Service Act to require the Secretary, acting through the Director of NIH, to implement the Cures Acceleration Network under which grants and contracts will be awarded to accelerate the development of high need cures. Defines "high need cure" as a drug, biological product, or device: (1) that is a priority to diagnose, mitigate, prevent, or treat harm from any disease or …	10409	N		In 2012, HHS implemented this provision as the Cures Acceleration Network. [253]	1		4	2
10	"The administrator of the HHS Substance Abuse and Mental Health Services Administration will award grants to centers of excellence for the treatment of depressive disorders (Debbie Stabenow, D-MI) (section 10410)."		"Requires the Secretary, acting through the Administrator of the Substance Abuse and Mental Health Services Administration, to... award grants to establish national centers of excellence for depression;"	10410	N		No evidence of implementation found. On , December 13, 2016, PL 114-255 (21st Century Cures Act) repealed this provision. [6]	1		0	0
10	"The HHS secretary may track the epidemiology of congenital heart disease and organize a National Congenital Heart Disease Surveillance System. NIH research on congenital heart disease will be expanded, intensified, and coordinated (Richard Durbin, D-IL) (section 10411)."		"Authorizes the Secretary, acting through the Director of CDC, to: (1) enhance and expand infrastructure to track the epidemiology of congenital heart disease and to organize such information into the National Congenital Heart Disease Surveillance System... Authorizes the Director of the National Heart, Lung, and Blood Institute to expand, intensify, and coordinate research and related Institute …	10411	N	N	In 2012, HHS implemented this provision. [254]	1		4	2
10	"A national education campaign for young women and health professionals about breast health and risk factors for breast cancer and enhanced prevention research will be developed by the CDC (Amy Klobuchar, D-MN) (section 10413)."		"Requires the Secretary, acting through the Director of CDC, to conduct: (1) a national education campaign to increase awareness of young women's knowledge regarding breast health and breast cancer; (2) an education campaign among physicians and other health care professionals to increase awareness of breast health of young women; and (3) prevention research on breast cancer in younger women. Req…	10413	N		In 2010, HHS implemented this provision. [255]	1		4	2
10	"A national diabetes prevention program is established at the CDC (freshman senators) (section 10501)."		"Requires the Secretary, acting through the Director of CDC, to establish a national diabetes prevention program targeted at adults at high risk for diabetes."	10501	N		HHS implemented this provision as the National Diabetes Prevention Program. [256]	1		4	2
10	"Community Health Centers and National Health Service Corps Fund: A fund is established to create an expanded and sustained national investment in community health centers and the National Health Service Corps. As amended by section 2303 of the Reconciliation Act, mandatory funding is increased for community health centers to $11 billion over five years. (Bernie Sanders, I-VT) [+$11B] (section 10…		"Establishes a Community Health Center Fund to provide for expanded and sustained national investment in community health centers. Authorizes appropriations to such Fund."	10503(b)(1-2)	Y		On April 16, 2015, PL 114-10 (Medicare Access and CHIP Reauthorization Act of 2015) "Appropriated a total of $3.9 billion to the CHCF for each of FY2016 and FY2017: $3.6 billion for the health centers program and $310 million for the NHSC." On December 22, 2017, PL 115-123 (Bipartisan Budget Act of 2018) "Appropriated $3.8 billion for FY2018 and $4.0 billion for FY2019 in mandatory funds to the C…	1		4	2
10	"Liability protections contained in the Federal Tort Claims Act are extended to free clinics (Patrick Leahy, D-VT) [+$100M] (section 10608)."		"Amends the Public Health Service Act to extend medical malpractice coverage to free clinics by deeming their officers, employees, board members, and contractors to be employees of the Public Health Service."	10608	N	N	HRSA web site updated Nov. 2018 suggests the policy change implemented by ACA is still in effect [289]	1		4	2
HCERA	"The HHS secretary will be provided with $1 billion to finance the administrative costs of implementing health insurance reform (section 1005)."		"Establishes a Health Insurance Reform Implementation Fund within the Department of Health and Human Services (HHS) and makes appropriations to the Fund for the administrative costs of carrying out PPACA and this Act."	1005	N		This provision was implemented and HHS used funds from the established Health Insurance Reform Implementation Fund. [258]	1		4	2		4	2	1	7
HCERA	"An additional payment is provided under the Medicare inpatient prospective-payment system to hospitals in counties in the bottom quartile of counties as ranked by risk-adjusted spending per Medicare enrollee [+$400M] (section 1109)."		"Directs the Secretary to provide for a specified payment for FY2011 and FY2012 to qualifying subsection (d) hospitals located in a county that ranks, based upon age, sex, and race adjusted spending per enrollee for Medicare parts A and B benefits, within the lowest quartile of such counties in the United States."	1109	N	Y	On August 16, 2010, CMS implemented this provision. [248, p. 50303-50312]	1		4	2
HCERA	"Medicaid payment rates to primary care physicians must be no less than 100 percent of Medicare payment rates in 2013 and 2014. Federal funding will finance 100 percent of the additional costs to States [+$8.3B] (section 1202)."	"Medicaid payment rates to primary care physicians must be no less than 100 percent of Medicare payment rates in 2013 and 2014."	"Requires that Medicaid payment rates to primary care physicians (family medicine, general internal medicine, or pediatric medicine) for furnishing primary care services in 2013 and 2014 be at least 100% of Medicare payment rates under... fee-for-service plans..."	1202(a)(1)	N	Y	On November 6, 2012, CMS implemented this provision. [265, p. 66670]	1		4	2
			"Requires that Medicaid payment rates to primary care physicians (family medicine, general internal medicine, or pediatric medicine) for furnishing primary care services in 2013 and 2014 be at least 100% of Medicare payment rates under... managed-care plans."	1202(a)(2)	N	Y	On November 6, 2012, CMS implemented this provision. [265, p. 66670]	1		4	2
		"Federal funding will finance 100 percent of the additional costs to States"	"Requires a 100% FMAP for the costs to states of meeting this requirement."	1202(b)	N	Y	On November 6, 2012, CMS implemented this provision. [265, p. 66670]	1		4	2
HCERA	"The $1.01 per gallon cellulosic biofuel producer credit is modified to exclude fuels with significant water, sediment, or ash content, such as black liquor. The provision is effective for fuel sold or used after January 1, 2010 [+$23.6B] (section 1408)."		"Revises the definition of "cellulosic biofuel" for purposes of the cellulosic biofuel producer tax credit to exclude any fuel if more than 4% of such fuel is any combination of water and sediment or the ash content of such fuel is more than 1% (determined by weight)."	1408	N		Self-implementing	1		4	2
HCERA	"The “economic substance doctrine” that has been used by courts to deny tax benefits for transactions lacking economic substance is clarified. The provision imposes a 40 percent strict liability penalty on underpayments attributable to a transaction lacking economic substance (unless the transaction was disclosed, in which case the penalty is 20 percent) [+$4.5B] (section 1409)."		"Sets forth rules for the application of the economic substance doctrine to transactions affecting taxpayer liability. Treats a transaction as having economic substance if: (1) the transaction changes in a meaningful way the taxpayer's economic position; and (2) the taxpayer has a substantial purpose, other than tax avoidance, for entering into a transaction. Imposes penalties for underpayments a…	1409	N	N	Self-implementing	1		4	2	See CBPP document from 2017 suggesting that repealing ACA would get rid of codification of economic substance doctrine (note there is also long-ish record of legal scholarhsip on this doctrine) - see writing by David Hariton, for example [290]

## Sheet: Column Header Definitions
Column	Definition
A: Title	The title (i.e., I-X, HCERA) of the Affordable Care Act that the provision is in.
B: McDonough Text [3]	McDonough's summary of the key provision(s), as written in Inside National Health Care Reform. [15]
D: CRS Summary [4, 5]	The Congressional Research Service's official summary of the provision. [2, 257]

## Sheet: Provisions Database Sources
Source
[1] Certified full-text version: Affordable Care Act (HealthCare.gov)
[2] Patient Protection and Affordable Care Act--Consolidated (PPACAcon)
[3] Inside National Health Care Reform (McDonough 2011)
[4] "Summary: H.R.3590 — 111th Congress (2009-2010)"
[5] "Summary: H.R.4872 — 111th Congress (2009-2010)"
[6] Legislative Actions to Modify the Affordable Care Act in the 111th-115th Congresses
[7] "Appropriations and Fund Transfers in the Affordable Care Act (ACA)"
[8] "Discretionary Spending Under the Affordable Care Act (ACA)" (2017-02-08 version)
[9] "Summary of the Health Workforce Provisions in the Patient Protection and Affordable Care Act: H.R. 3590"
[10] "CFDA Summary Report"
[11] HRSA "Find Grants" Tool Search Results for Sec. 5102 Grants
[12] "Affordable Care Act State Healthcare Workforce Planning and Implementation Grants Frequently Asked Questions"
[13] "Affordable Care Act: State Health Care Workforce Planning Grants"
[14] "Affordable Care Act: State Health Care Workforce Implementation Grants"
[15] Omitted
[16] "Summary Information Regarding Medicare's Primary Care Incentive Payment Program (PCIP)"
[17] "Physician Bonuses"
[18] "MedPAC Again Voices Support for Continuing Primary Care Payment Hike"
[19] "Proposals Call for Better Primary Care Incentive Payments"
[20] "Primary Care Incentive Payment Program (PCIP)"
[21] "MedPAC Proposal Would Continue Primary Care Payment Increase"
[22] "MedPAC Asks Congress to Boost Primary Care Payments"
[23] "June 2018 Report to the Congress: Medicare and the Health Care Delivery System"
[24] "March report highlight: MedPAC recommends per beneficiary payment for primary care"
[25] "Incentive Payment Program for Primary Care Services, Section 5501(a) of The Affordable Care Act"
[26] "Section 5501(b) Incentive Payment Program for Major Surgical Procedures Furnished in Health Professional Shortage Areas under the Affordable Care Act"
[27] "The College weighs in on leading health care issues"
[28] "Expired and expiring ACA provisions"
[29] "Direct Graduate Medical Education (DGME)"
[30] "Section 5503 Cap Decreases and Increases - Posted 8/15/2011 [ZIP, 27KB]"
[31] "Centers for Medicare and Medicaid Services: Decision of the Administrator"
[32] "Another of Obamacare’s Unloved Provisions Is Gone"
[33] "What’s Hidden in the Senate Spending Bill?"
[34] "Centers for Medicare and Medicaid Services: Decision of the Administrator"
[35] "CMS Manual System: Pub 100-20 One-Time Notification"
[36] "HHS awards $58.7 million to bolster America’s health care workforce"
[37] "What is HPOG?"
[38] "Personal and Home Care Aide State Training (PHCAST) Demonstration Program Evaluation"
[39] "Personal and Home Care Aide State Training (PHCAST) Demonstration Program: Report to Congress on Initial Implementation"
[40] "Health Reform Implementation Timeline"
[41] Levy, Ying, Bagley summary of [2]
[42] HRSA Presentation: "Bureau of Health Professions: Fiscal Year 2012 Budget" (Heinrich 2011)
[43] "The Dormant National Health Care Workforce Commission Needs Congressional Funding To Fulfill Its Promise"
[44] "Graduate Nurse Education Demonstration"
[45] "Evaluation of the Graduate Nurse Education Demonstration Project: Report to Congress"
[46] "Medicare Claims Processing Manual"
[47] "National Prevention Council"
[48] "Healthy Aging in Action"
[49] "§300u–10. National Prevention, Health Promotion and Public Health Council"
[50] "U.S. Preventive Services Task Force"
[51] "About the USPSTF"
[52] "What is the CPSTF?"
[53] "Community Preventive Services Task Force Findings"
[54] "Medicaid Incentives For Prevention Of Chronic Disease Final Evaluation Report"
[55] "Medicaid Incentives for the Prevention of Chronic Diseases Model"
[56] "Wellness Prospective Evaluation Final Report"
[57] "Medical Diagnostic Equipment Accessibility Standards"
[58] "Causes of Action under the Patient Protection and Affordable Care Act"
[59] "Implementation Guidance on Data Collection Standards for Race, Ethnicity, Sex, Primary Language, and Disability Status"
[60] "Implementing Health Reform: Improved Data Collection and the Monitoring of Health Disparities"
[61] "The Hospital Value-Based Purchasing (VBP) Program"
[62] "Medicare program; hospital inpatient value-based purchasing program. Final rule."
[63] Value-Based Purchasing Demonstrations for Critical Access and Small PPS Hospitals
[64] RURAL HOSPITAL PARTICIPATION AND PERFORMANCE IN VALUE-BASED PURCHASING AND OTHER DELIVERY SYSTEM REFORM INITIATIVES
[65] Medicare FFS Physician Feedback Program/Value-Based Payment Modifier
[66] "PPS-Exempt Cancer Hospital Quality Reporting (PCHQR) Program"
[67] "Plan to Implement a Medicare Skilled Nursing Facility Value-Based Purchasing Program"
[68] "Plan to Implement a Medicare Home Health Agency Value-Based Purchasing Program"
[69] "Medicare Ambulatory Surgical Center Value-Based Purchasing Implementation Plan"
[70] "2011 Report to Congress: National Strategy for Quality Improvement in Health Care"
[71] "2012 Annual Progress Report to Congress National Strategy for Quality Improvement in Health Care"
[72] "National Quality Strategy"
[73] "Shared Savings Program"
[74] "76 FR 67801"
[75] "Program Statutes & Regulations"
[76] "BUNDLED PAYMENTS FOR CARE IMPROVEMENT INITIATIVE FREQUENTLY ASKED QUESTIONS"
[77] "Bundled Payments for Care Improvement Initiative"
[78] "Medicare Program; Hospital Inpatient Prospective Payment Systems for Acute Care Hospitals and the Long-Term Care Hospital Prospective Payment System and FY 2012 Rates; Hospitals’ FTE Resident Caps for Graduate Medical Education Payment; Final Rule"
[79] "Readmissions Reduction Program (HRRP)"
[80] "Reducing Unnecessary Hospital Readmissions: The Role of the Patient Safety Organization"
[81] "Community-based Care Transitions Program"
[82] "78 FR 72255"
[83] "Impact of Home Health Payment Rebasing on Beneficiary Access to and Quality of Care"
[84] "Medicare Home Health Study: An Investigation on Access to Care and Payment for Vulnerable Patient Populations"
[85] "Home Health Care Study and Report: Appendix"
[86] "Home Health Agency (HHA) Center"
[87] "82 FR 35270"
[88] "80 FR 47141"
[89] "75 FR 70371"
[90] "Wage Index Reform"
[91] "Medicare Provisions in the Patient Protection and Affordable Care Act (PPACA): Summary and Timeline"
[92] "Part D Information for Pharmaceutical Manufacturers"
[93] "Coverage Gap Discount Program: How Does It Work?"
[94] 76 FR 21431
[95] "Inpatient Psychiatric Facility Quality Reporting (IPFQR) Program"
[96] "Inpatient Psychiatric Facility Quality Reporting Program Manual"
[97] "Inpatient Psychiatric Facility Quality Reporting Program Resources and Tools"
[98] "Community Living Assistance Services and Supports (CLASS): Overview and Summary of Provisions "
[99] "80 FR 52300"
[100] "OIRA Conclusion of EO 12866 Regulatory Review"
[101] RIN 0906-AB08
[102] 340B Program Omnibus Guidance Withdrawn
[103] "340B Update: Trump Administration Withdraws Omnibus Guidance, Delays Final Rule on 340B Drug Pricing and CMPs"
[104] "Affordable Care Act Tax Provisions"
[105] "Reporting is Voluntary for All Employers for 2011 and Small Employers for 2012"
[106] "Employer-Provided Health Coverage Informational Reporting Requirements: Questions and Answers"
[107] "Internal Revenue Bulletin: 2010-44"
[108] "IRS releases interim guidance on reporting cost of employer-sponsored coverage on W-2"
[109] "Form W-2 Reporting of Employer-Sponsored Health Coverage"
[110] "Publication 969 (2017), Health Savings Accounts and Other Tax-Favored Health Plans"
[111] "Publication 969, Health Savings Accounts and Other Tax-Favored Health Plans" (2012)
[112] "Internal Revenue Bulletin: 2012-26"
[113] "26 U.S. Code § 6041 - Information at source"
[114] RIN 1545-BJ44
[115] TD 9643 of "Internal Revenue Bulletin: 2013-51"
[116] "Frequently Asked Questions: Retiree Drug Subsidy"
[117] "Itemized Deduction for 2016 Medical Expenses"
[118] "79 FR 56891"
[119] RIN 1545-BK54
[120] TD 9651 of "Internal Revenue Bulletin: 2014-4"
[121] "Employer's Tax Guide to Fringe Benefits" (for use in 2013)
[122] "Employer's Tax Guide to Fringe Benefits" (for use in 2018)
[123] "Qualifying Therapeutic Discovery Project Credits and Grants"
[124] "Indoor Tanning Services Tax Center"
[125] "Quality Assurance & Performance Improvement"
[126] "QAPI Description and Background"
[127] Nursing Home Compare
[128] "Staffing Data Submission PBJ"
[129] "State Award Amount Chart"
[130] "CMS National Background Check Program"
[131] "Patient-Centered Outcomes Research Institute"
[132] "Enhanced Enrollment Screening of Medicare Providers: Early Implementation Results"
[133] "Revalidations"
[134] "Affordable Care Act Provider Compliance Programs: Getting Started Webinar"
[135] 76 FR 5861
[136] 77 FR 25283
[137] 78 FR 20473
[138] 75 FR 73169
[139] 75 FR 81885
[140] "Instructions for Uniform Suspected Insurance Fraud Reporting Form"
[141] "Elder Justice Coordinating Council (EJCC)"
[142] "The Elder Justice Act: Background and Issues for Congress"
[143] "77 FR 68891"
[144] "42 CFR 412"
[145] "77 FR 53257"
[146] "76 FR 51475"
[147] "75 FR 71799"
[148] "78 FR 9457"
[149] "76 FR 48485"
[150] "81 FR 68688"
[151] "80 FR 46389"
[152] https://www.federalregister.gov/
[153] "78 FR 16795"
[154] "81 FR 67438"
[155] "PCORI Milestones"
[156] "81 FR 10719"
[157] RIN: 0938-AS84
[158] "75 FR 24437"
[159] "81 FR 27497"
[160] "81 FR 88334"
[161] "82 FR 4100"
[162] "80 FR 7911"
[163] "76 FR 40052"
[164] RIN: 0938-AQ61
[165] "Instructions for Uniform Suspected Insurance Fraud Reporting Form"
[166] "75 FR 80820"
[167] "75 FR 81885"
[168] "National Correct Coding Initiative"
[169] "75 FR 65350"
[170] "29 CFR 2520"
[171] "78 FR 13797"
[172] "Tort Reform: The Impact of the ACA on Medical Malpractice"
[173] "78 FR 44016"
[174] "IRS Issues Guidance Explaining 2011 Changes to Flexible Spending Arrangements"
[175] "Notice 2011-92" (published August 18, 2011; date not in document, but in Google results for "IRS Notice 2011-92:)
[176] "Internal Revenue Bulletin: 2013-51"
[177] "IRS Issues Guidance on Expanded Adoption Credit Available for Tax-Year 2010"
[178] "76 FR 26489"
[179] "75 FR 73169"
[180] "78 FR 50495"
[181] "Report to Congress: National Strategy for Quality Improvement in Health Care"
[182] "78 FR 48233"
[183] "75 FR 73169"
[184] "77 FR 22071"
[185] "75 FR 75884"
[186] "FAQs: What’s the Latest on IPAB?"
[187] "75 FR 33983"
[188] "SMD# 13-002"
[189] "SDL # 11-007"
[190] "79 FR 71155"
[191] "82 FR 2810"
[192] "75 FR 80073"
[193] "75 FR 34537"
[194] "75 FR 27121"
[195] "75 FR 37187"
[196] "75 FR 41726"
[197] "75 FR 43329"
[198] "77 FR 8667"
[199] "75 FR 74863"
[200] "Consumer Assistance Programs: Federal and State"
[201] "76 FR 29963"
[202] "75 FR 45013"
[203] "75 FR 24450"
[204] "Health Insurance Transparency under the Affordable Care Act"
[205] "76 FR 40457"
[206] "78 FR 13405"
[207] "78 FR 33157"
[208] "Affordable Care Act Implementation FAQs - Set 15"
[209] "78 FR 12833"
[210] "78 FR 17313"
[211] "77 FR 18309"
[212] "Implementing the Affordable Care Act: Revisiting the ACA’s Essential Health Benefits Requirements"
[213] "78 FR 60653"
[214] "76 FR 77392"
[215] "77 FR 11700"
[216] "76 FR 53903"
[217] "Insurance Across State Lines"
[218] "78 FR 15559"
[219] "77 FR 17219"
[220] "78 FR 15409"
[221] "77 FR 30377"
[222] "79 FR 36640"
[223] "With The Federal Individual Mandate Gone, States Might Step Up: Lessons From Massachusetts"
[224] "78 FR 53646"
[225] "Regulations Pursuant to the Patient Protection and Affordable Care Act (P.L. 111-148)"
[226] "Guidance on the Notice to Employees of Coverage Options under Fair Labor Standards Act §18B and Updated Model Election Notice under the Consolidated Omnibus Budget Reconciliation Act of 1985"
[227] "79 FR 8543"
[228] "83 FR 3880"
[229] "Trump Administration Prioritizes Religious and Moral Exemptions for Health Care Workers"
[230] "Section 1553 of the Affordable Care Act"
[231] "78 FR 59101"
[232] "81 FR 31375"
[233] "78 FR 13222"
[234] "78 FR 19917"
[235] "77 FR 17143"
[236] "79 FR 71426"
[237] "SMDL# 11-001"
[238] "77 FR 26827"
[239] "81 FR 5169"
[240] "78 FR 57293"
[241] "75 FR 82405"
[242] "77 FR 286"
[243] "76 FR 32815"
[244] "SMDL# 10-024"
[245] "Health Insurance Expiring Provisions of the 114th Congress, Second Session"
[246] "About Us"
[247] "About PAF"
[248] "75 FR 50041"
[249] "Medicare Provisions in the Patient Protection and Affordable Care Act (PPACA): Summary and Timeline"
[250] "80 FR 70885"
[251] "75 FR 55582"
[252] "Diabetes Report Card 2012"
[253] "Cures Acceleration Network"
[254] "Tracking and Research"
[255] "HHS Has Implemented Initiatives Aimed at Young Women"
[256] "National Diabetes Prevention Program"
[257] "National Health Care Workforce Commission"
[258] "Health Insurance Reform Implementation Fund"
[259] "H. R. 4872"
[260] "Over 5.2 Million People with Medicare Save $3.7 Billion on Prescription Drugs Thanks to the Affordable Care Act"
[261] "78 FR 31283"
[262] "Indexing in the Affordable Care Act: The Impact on the Federal Budget"
[263] "Market Basket Data"
[264] "Actual Regulation Market Basket Updates [ZIP, 17KB]"
[265] "77 FR 66669"
[266] "78 FR 72393"
[267] "26 CFR Parts 51 and 602"
[268] "77 FR 72924"
[269] Prevention and Public Health Fund (APHA)
[270] Q&A on 4004i
[271] CBO letter to Pelosi March 2010
[272] DOL web page on nursing breaks/rooms
[273] HHS web page on nursing breaks/rooms
[274] HRSA web page on Teaching Health Center GME program
[275] IPS on capping deductibility of health insurance executive pay
[276] OPM web page on Multi-State Plans
[277] The Incidental Economist blog on cost sharing reductions and "silver loading"
[278] SHRM blog post on low take-up of small business health insurance tax credit
[279] CIGNA fact sheet that discusses size phase-in of employer responsibility requirement
[280] Kaiser brief on SCOTUS decision in NFIB v Sebelius as it affects Medicaid
[281] The Atlantic piece by Avik Roy on "Louisiana Purchase"
[282] CRS report on Medicaid FMAP
[283] KFF brief on Medicaid delivery system reform
[284] Proposed rule on (among other things) nursing home transparency, ACA Section 101
[285] ACL website describing Elder Justice Act (part of Title VI)
[286] SSA web page on Medicare for Libby MT residents
[287] paper on value-based payments for hospice
[288] CRS report on National Health Service Corps
[289] HRSA web page on FTCA coverage for free clinics
[290] CBPP brief on economic substance doctrine and implications of repeal
[291] Health Affairs blog post on tanning tax
[292] Health Affairs blog post on status of DSH reductions
[293] Atteberry et al on biosimilars

## Sheet: Summary Ratings
			CBO/JCT Projection,
	Number of Key Provisions	Average Implementation Score	2010 – 2019			Dollar-Weighted			No. of Provisions Weighted			Average Implementation Score, 0-4 Instead Of 0-2
			(Billions)										Weighted Score (Dollars)
			Spending	Revenue		Total $	Weighted score
I. Quality, Affordable Health Care for All Americans (Private coverage expansion)	49	0.877551	509	81		590	517.755		43			0.867347	511.735
II. Role of Public Programs (Medicaid expansion)	17	0.78125	459	53		512	400		13.2812			0.78125	400
III. Improving the Quality and Efficiency of Health Care (Medicare payments changes)	35	0.957143	54	450		504	482.4		33.5			0.957143	482.4
IV. Prevention of Chronic Disease and Improving Public Health	19	0.85	18	1		19	16.15		16.15			0.8375	15.9125
V. Health Care Workforce	9	0.944444	18	0		18	17		8.5			0.916667	16.5
VI. Transparency and Program Integrity	43	0.895349	3	7		10	8.95349		38.5			0.895349	8.95349
VII. Improving Access to Innovative Medical Therapies	7	1	0	7		7	7		7			0.75	5.25
VIII. CLASS Act	1	0	0	70		70	0		0			0	0
IX. Revenue Provisions	19	0.789474	0	438		438	345.789		15			0.802632	351.553
TOTAL	199	0.827974	1061	1107		2168	1795.05		174.931
		Dollar-Weighted Overall Average				0.827974			0.879052				0.826708
